# Supplementary material
Source: publisher figshare collection journal article supplement (https://acs.figshare.com/ndownloader/files/4714711)

# Low-Valent Niobium-Catalyzed Reduction of $\alpha, \alpha, \alpha$ -Trifluorotoluenes

## *Supporting Information*

Kohei Fuchibe, Yoshitaka Ohshima, Ken Mitomi, and Takahiko Akiyama\*

Department of Chemistry, Faculty of Science, Gakushuin University  
1-5-1 Mejiro, Toshima-ku, Tokyo 171-8588, Japan

*takahiko.akiyama@gakushuin.ac.jp*

## – Table of Contents –

1. General Statement: S2
2. Spectra Data of the Products: S3
  - 2-1.  $^1\text{H}$  and  $^{13}\text{C}$  NMR spectra data of **2a**.
  - 2-2.  $^1\text{H}$  and  $^{13}\text{C}$  NMR spectra data of **2b**.
  - 2-3.  $^1\text{H}$  and  $^{13}\text{C}$  NMR spectra data of **2c**.
  - 2-4.  $^1\text{H}$  and  $^{13}\text{C}$  NMR spectra data of **2d**.
  - 2-5.  $^1\text{H}$ ,  $^{13}\text{C}$ , and  $^{19}\text{F}$  NMR spectra data of **2e**.
  - 2-6.  $^1\text{H}$ ,  $^{13}\text{C}$ , and  $^{19}\text{F}$  NMR spectra data of **2f**.
  - 2-7.  $^1\text{H}$  and  $^{13}\text{C}$  NMR spectra data of **2h**.
  - 2-8. Characterization data of **1d** ( $^1\text{H}$ ,  $^{13}\text{C}$ ,  $^{19}\text{F}$ , and IR spectra).
  - 2-9. Characterization data of **3** ( $^1\text{H}$ ,  $^{13}\text{C}$ ,  $^{19}\text{F}$ , and IR spectra).
  - 2-10. Characterization data of **4** ( $^1\text{H}$ ,  $^{13}\text{C}$ ,  $^{19}\text{F}$ , and IR spectra).
3.  $^1\text{H}$ ,  $^{13}\text{C}$ , and  $^{19}\text{F}$  NMR Spectra of **2a-h**, **1d**, **3**, and **4**: S7

## 1. General Statement

1,2-Dimethoxyethane (DME) was distilled, and stored over molecular sieves 4A under nitrogen atmosphere.  $\text{NbCl}_5$  was used as purchased (Aldrich Co.) and handled under argon atmosphere. All the reactions were carried out under argon atmosphere.

Column chromatography and preparative thin layer chromatography (preparative TLC) were conducted on silica gel (PSQ 60B, Fuji Silysia Chemical Ltd. for column chromatography and Wakogel B-5F, Wako Pure Chemical Industries for preparative TLC, respectively).

NMR spectra were recorded on Unity Inova-400 instrument (Varian Ltd., 400 MHz for  $^1\text{H}$ , 100 MHz for  $^{13}\text{C}$ , 376 MHz for  $^{19}\text{F}$ ) and JNM-AI300 instrument (JEOL, 300 MHz for  $^1\text{H}$ , 75 MHz for  $^{13}\text{C}$ ) using  $\text{CDCl}_3$  as a solvent. Chemical shifts ( $\delta$ ) for  $^1\text{H}$  were referenced to tetramethylsilane ( $\delta = 0.00$  ppm) as an internal standard. Chemical shifts ( $\delta$ ) for  $^{13}\text{C}$  were referenced to a solvent signal ( $\text{CDCl}_3$ ,  $\delta = 77.00$  ppm). Chemical shifts ( $\delta$ ) for  $^{19}\text{F}$  were referenced to  $\alpha,\alpha,\alpha$ -trifluorotoluene ( $\delta = -63.9$  ppm) or hexafluorobenzene ( $\delta = -162.9$  ppm) as an internal standard. IR spectra were recorded on FTIR-8600PC instrument (Shimadzu Co.) using  $\text{CHCl}_3$  as a solvent.

## 2. Spectra Data of the Products

### 2-1. 4-Phenyltoluene **2a**.

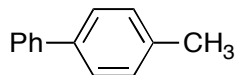

**<sup>1</sup>H NMR** (400 MHz, CDCl<sub>3</sub>): δ = 7.58 (2H, d, *J* = 7.2 Hz), 7.49 (2H, d, *J* = 8.0 Hz), 7.42 (2H, t, *J* = 7.4 Hz), 7.32 (1H, t, *J* = 7.2 Hz), 7.25 (2H, d, *J* = 8.0 Hz), 2.39 (3H, s). **<sup>13</sup>C NMR** (100 MHz, CDCl<sub>3</sub>): δ = 141.1, 138.3, 137.0, 129.5, 128.7, 127.0, 126.9, 21.1.

The <sup>1</sup>H and <sup>13</sup>C NMR spectra were in complete agreement with those in the literature (Tao, B.; Boykin, D. W. *J. Org. Chem.* **2004**, *69*, 4330-4335. ).

### 2-2. 3-Phenyltoluene **2b**.

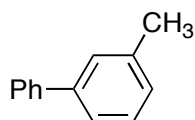

**<sup>1</sup>H NMR** (400 MHz, CDCl<sub>3</sub>): δ = 7.59 (2H, d, *J* = 8.0 Hz), 7.46–7.37 (4H, m), 7.36–7.30 (2H, m), 7.17 (1H, d, *J* = 7.6 Hz), 2.42 (3H, s). **<sup>13</sup>C NMR** (100 MHz, CDCl<sub>3</sub>): δ = 141.3, 141.2, 138.3, 128.7, 128.6, 127.97, 127.96, 127.2, 127.1, 124.3, 21.5.

The <sup>1</sup>H and <sup>13</sup>C NMR spectra were in complete agreement with those in the literature (‘*The Aldrich Library of <sup>13</sup>C and <sup>1</sup>H FT NMR Spectra*’, Pouchert, C. P.; Behnke, J., Ed., Edition I, Vol. 2, 32A.).

### 2-3. 4,4'-Dimethylbiphenyl **2c**.

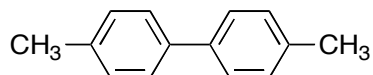

**<sup>1</sup>H NMR** (400 MHz, CDCl<sub>3</sub>): δ = 7.48 (4H, d, *J* = 8.4 Hz), 7.24 (4H, d, *J* = 8.4 Hz), 2.39 (6H, s). **<sup>13</sup>C NMR** (100 MHz, CDCl<sub>3</sub>): δ = 138.2, 136.7, 129.4, 126.8, 21.1.

The <sup>1</sup>H and <sup>13</sup>C NMR spectra were in complete agreement with those in the literature (Xu, X.; Cheng, D.; Pei, W. *J. Org. Chem.* **2006**, *71*, 6637.).

2-4. 3,5-Dimethylbiphenyl **2d**.

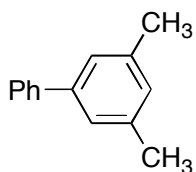

**<sup>1</sup>H NMR** (400 MHz, CDCl<sub>3</sub>): δ = 7.58 (2H, d, *J* = 7.4 Hz), 7.42 (2H, t, *J* = 7.6 Hz), 7.33 (1H, t, *J* = 7.4 Hz), 7.21 (2H, s), 7.00 (1H, s), 2.38 (6H, s). **<sup>13</sup>C NMR** (75 MHz, CDCl<sub>3</sub>): δ = 141.4, 141.2, 138.2, 128.9, 128.6, 127.2, 127.1, 125.1, 21.4.

The <sup>1</sup>H and <sup>13</sup>C NMR spectra were in complete agreement with those in the literature (Li, J.-H; Tang, B.-X; Tao, L.-M.; Xie, Y.-X.; Liang, Y.; Zhang, M.-B. *J. Org. Chem.* **2006**, 71, 7488. ).

2-5. 4-Fluoro-4'-methylbiphenyl **2e**.

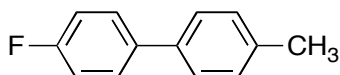

**<sup>1</sup>H NMR** (400 MHz, CDCl<sub>3</sub>): δ = 7.54–7.51 (2H, dd, *J* = 8.8, 5.6 Hz), 7.44 (2H, d, *J* = 8.0 Hz), 7.24 (2H, d, *J* = 8.0 Hz), 7.11 (2H, t, *J* = 8.8 Hz), 2.39 (3H, s). **<sup>13</sup>C NMR** (100 MHz, CDCl<sub>3</sub>): δ = 162.3 (d, *J* = 244 Hz), 137.3, 137.2 (d, *J* = 3.0 Hz), 137.0, 129.5, 128.4 (d, *J* = 8.0 Hz), 126.8, 115.5 (d, *J* = 21 Hz), 21.1. **<sup>19</sup>F NMR** (376 MHz, CDCl<sub>3</sub>): δ = –117.5 (m).

The <sup>1</sup>H and <sup>13</sup>C NMR spectra were in complete agreement with those in the literatures (<sup>1</sup>H NMR: Moore, L. R.; Shaughnessy, K. H. *Org. Lett.* **2004**, 6, 225; <sup>13</sup>C NMR: Wang, Y.; Sauer, D. R. *Org. Lett.* **2004**, 6, 2793.).

2-6. 3-Fluoro-4-phenyltoluene **2f**.

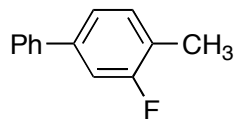

**<sup>1</sup>H NMR** (400 MHz, CDCl<sub>3</sub>): δ = 7.56 (2H, d, *J* = 7.4 Hz), 7.44 (2H, t, *J* = 7.4 Hz), 7.35 (1H, t, *J* = 7.2 Hz), 7.29–7.22 (3H, m), 2.31 (3H, s). **<sup>13</sup>C NMR** (100 MHz, CDCl<sub>3</sub>): δ = 161.6 (d, *J* = 243 Hz), 140.7 (d, *J* = 7.6 Hz), 139.9 (d, *J* = 2.3 Hz), 131.7 (d, *J* = 5.3 Hz), 128.8, 127.5, 126.9, 123.6 (d, *J* = 17 Hz), 122.3 (d, *J* = 3.1 Hz), 113.4 (d, *J* = 23 Hz), 14.3 (d, *J* = 3.4 Hz). **<sup>19</sup>F NMR** (376 MHz, CDCl<sub>3</sub>): δ = –118.7 (t, *J* = 9.2 Hz).

The <sup>1</sup>H and <sup>13</sup>C NMR spectra were in complete agreement with those in the literature (Lipshutz, B. H.; Siegmann, K.; Garcia, E.; Kayser, F. *J. Am. Chem. Soc.* **1993**, *115*, 9276.).

2-7. 4-Benzyltoluene **2h**.

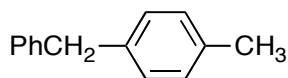

**<sup>1</sup>H NMR** (400 MHz, CDCl<sub>3</sub>): δ = 7.29–7.26 (2H, m), 7.22–7.16 (3H, m), 7.09 (4H, s), 3.94 (2H, s), 2.31 (3H, s). **<sup>13</sup>C NMR** (100 MHz, CDCl<sub>3</sub>): δ = 141.4, 138.0, 135.5, 129.1, 128.84, 128.78, 128.4, 125.9, 41.5, 21.0.

The <sup>1</sup>H and <sup>13</sup>C NMR spectra were in complete agreement with those in the literature (Molander, G. A.; Elia, M. D. *J. Org. Chem.* **2006**, *71*, 9198.).

2-8. 3-Methyl-5-(trifluoromethyl)biphenyl **1d**.

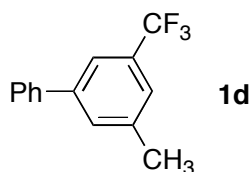

**<sup>1</sup>H NMR** (400 MHz, CDCl<sub>3</sub>): δ = 7.63 (1H, s), 7.61–7.53 (3H, m), 7.50–7.43 (2H, m), 7.42–7.36 (2H, m), 2.48 (3H, s). **<sup>13</sup>C NMR** (100 MHz, CDCl<sub>3</sub>): δ = 142.0, 139.9, 139.2, 131.2, 131.1 (q, *J* = 31.7 Hz), 128.9, 127.9, 127.2, 124.5, (q, *J* = 3.7 Hz), 124.3 (q, *J* = 271 Hz), 121.2 (q, *J* = 3.8 Hz), 21.4. **<sup>19</sup>F NMR** (376 MHz, CDCl<sub>3</sub>): δ = –63.7 (s). **IR** (CHCl<sub>3</sub>): ν̄ = 3618, 3018, 2401, 1356, 1128, 872 cm<sup>–1</sup>.

2-9. 4-Phenyl-α,α-difluorotoluene **3**.

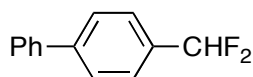

**<sup>1</sup>H NMR** (400 MHz, CDCl<sub>3</sub>): δ = 7.67 (2H, d, *J* = 7.6 Hz), 7.62–7.55 (4H, m), 7.46 (2H, t, *J* = 7.8 Hz), 7.38 (1H, t, *J* = 7.2 Hz), 6.69 (1H, t, *J* = 56 Hz). **<sup>13</sup>C NMR** (100 MHz, CDCl<sub>3</sub>): δ = 143.7, 140.1, 133.2 (t, *J* = 13 Hz), 128.9, 127.9, 127.4, 127.2, 126.0 (t, *J* = 5.9 Hz), 114.7 (t, *J* = 237 Hz). **<sup>19</sup>F NMR** (376 MHz, CDCl<sub>3</sub>): δ = –111.5 (d, *J* = 56 Hz). **IR** (CHCl<sub>3</sub>): ν̄ = 3020, 1377, 1219, 1076, 1034, 733 cm<sup>–1</sup>.

2-10. 3-Phenyl-α,α-difluorotoluene **4**.

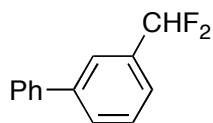

**<sup>1</sup>H NMR** (400 MHz, CDCl<sub>3</sub>): δ = 7.73–7.67 (2H, m), 7.59 (2H, d, *J* = 8.4 Hz), 7.55–7.43 (4H, m), 7.38 (1H, t, *J* = 7.2 Hz), 6.70 (1H, t, *J* = 56 Hz). **<sup>13</sup>C NMR** (100 MHz, CDCl<sub>3</sub>): δ = 141.8, 140.2, 134.9 (t), 129.4 (t, *J* = 2.0 Hz), 129.2, 128.9, 127.8, 127.2, 124.32 (t, *J* = 6.1 Hz), 124.28 (t, *J* = 6.1 Hz), 114.7 (t, *J* = 238 Hz). **<sup>19</sup>F NMR** (376 MHz, CDCl<sub>3</sub>): δ = –111.8 (d, *J* = 56 Hz). **IR** (CHCl<sub>3</sub>): ν̄ = 3067, 1369, 1219, 1065, 1034, 702 cm<sup>–1</sup>.

3.  $^1\text{H}$ ,  $^{13}\text{C}$ , and  $^{19}\text{F}$  NMR Spectra of **2a-h**, **1d**, **3**, and **4**

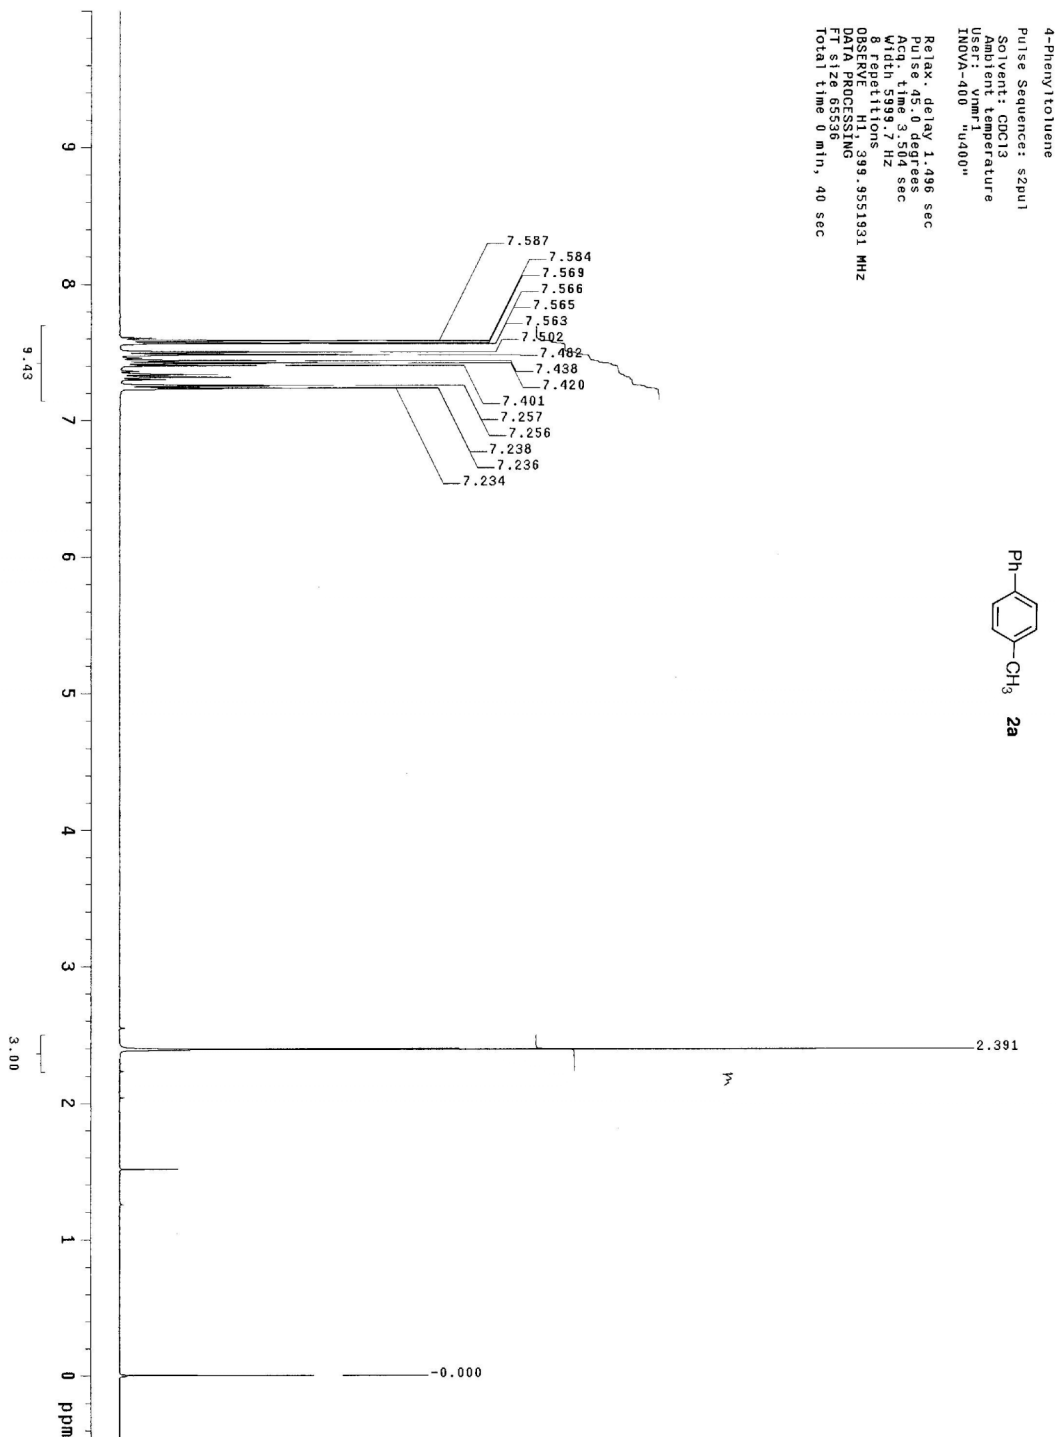

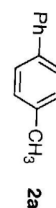

STANDARD C13 OBSERVE  
Pulse Sequence: zgpg30  
Solvent: CDCl<sub>3</sub>  
Ambient temperature  
User: ymm-1  
INOVA-400 "u400"  
Relax. delay 0.499 sec  
Pulse 45.0 degrees  
Acq. time 1.501 sec  
Width 25141.4 Hz  
400 MHz  
OBSERVE C13 100.568817 MHz  
DECOUPLE H1 398.9571931 MHz  
Power 42 dB  
continuously on  
WALTZ-16 modulated  
DATA PROCESSING  
Line broadening 1.0 Hz  
FT size 131072  
Total time 34 min, 17 sec

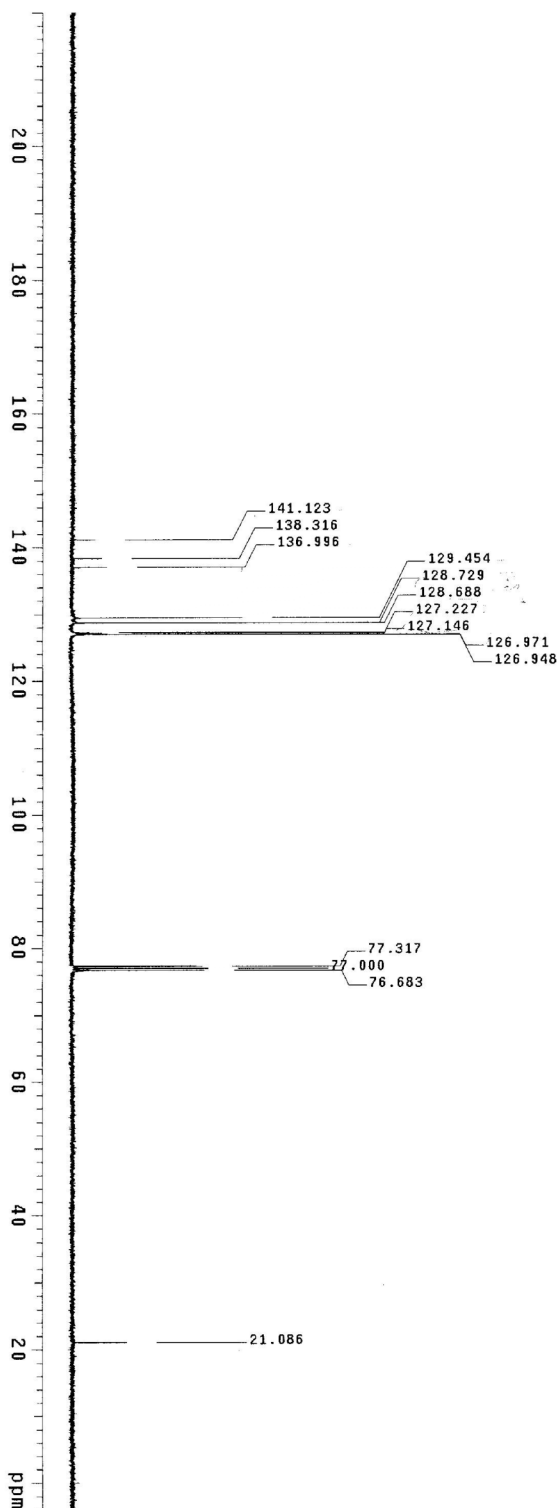



FIG. 4N  
 STANDARD H1 OBSERVE  
 Pulse Sequence: szpu1  
 Solvent: CDCl3  
 Ambient Temperature  
 User Name: jh  
 INOVA-400 "u400"  
 Relax. delay 1.496 sec  
 Pulse delay 0.0496 sec  
 Acq. time 3.3504 sec  
 Width 5999.7 Hz  
 8 repetitions  
 OBSERVE H1, 399.3551833 MHz  
 DATA PROCESSING  
 FI size 65536  
 Total time 0 min, 40 sec

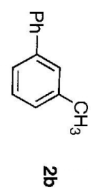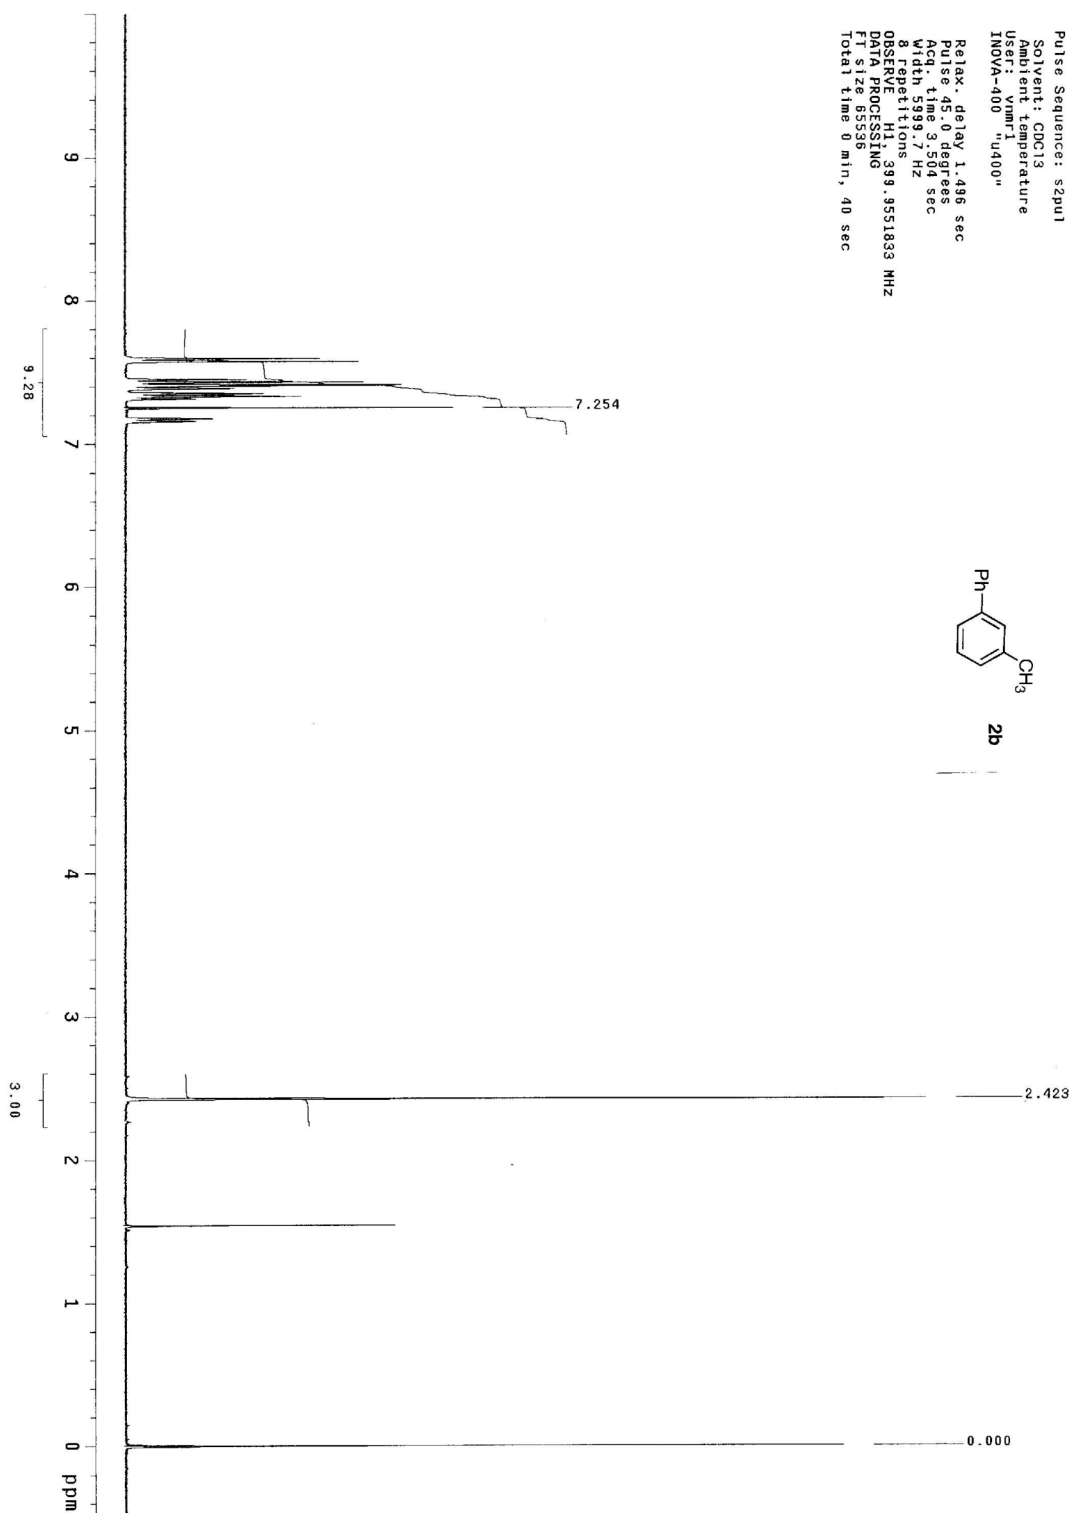

STANDARD C13 OBSERVE  
Pulse Sequence: s2pul1  
Solvent: CDCl3  
Ambient Temperature  
User Name: s2pul1  
INOVA-400 "u400"  
Relax. delay 0.499 sec  
Puls. 45.000 sec  
Acq. time 1.501 sec  
Width 2514.4 Hz  
1024 repetitions  
OBSERVE C13, 100.568120 MHz  
DECOUPLE H1, 399.9571931 MHz  
Power 42 dB  
Continuously on  
SMA 12.16 modulated  
DMA PROCESSING  
Line Resolution 1.0 Hz  
Ft size 131072  
Total time 34 min, 17 sec

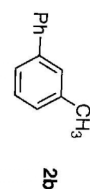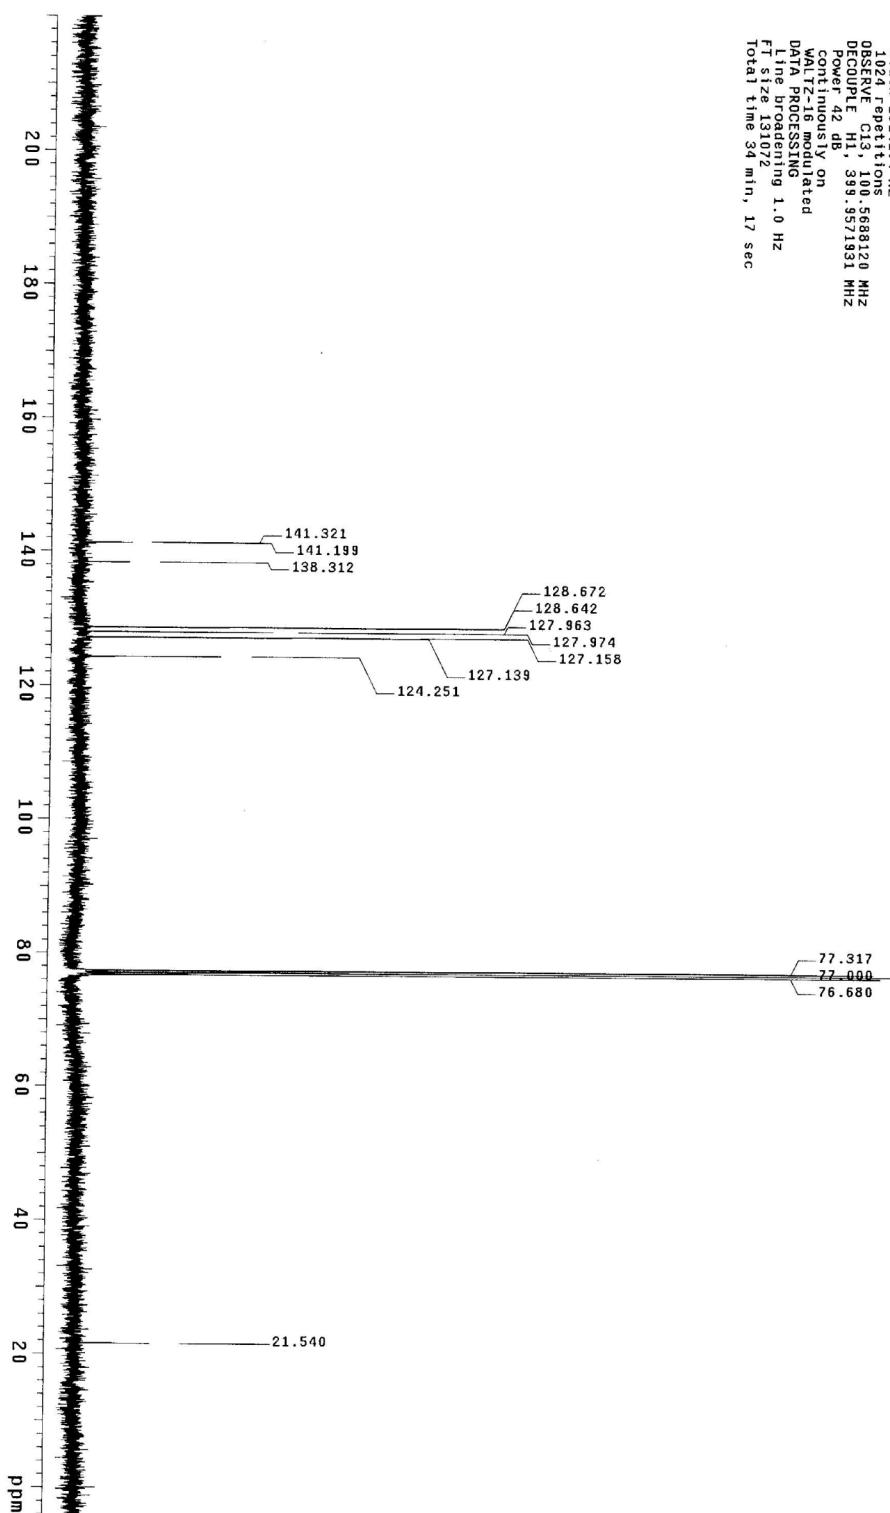

PFG 4N  
 STANDARD H1 OBSERVE  
 Pulse Sequence: s2pul  
 Solvent: CDCl3  
 Ambient temperature  
 User: vmar1  
 INOVA-400 "u400"  
 Relax. delay 1.496 sec  
 Pulse 45.0 degrees  
 Acq. time 3.504 sec  
 Width 5999.7 Hz  
 8 repetitions  
 OBSERVE H1 399.9551818 MHz  
 DATA PROCESSING  
 F1 size 65536  
 Total time 0 min, 40 sec

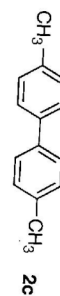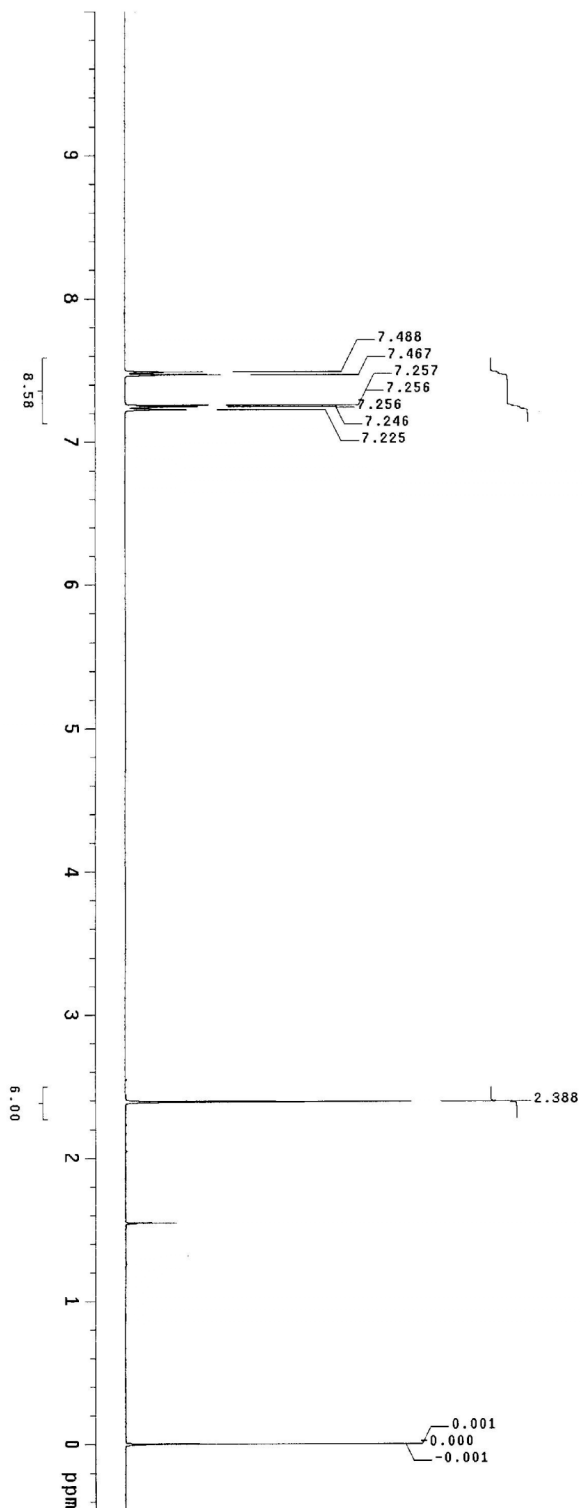

STANDARD C13 OBSERVE  
Pulse Sequence: s2pul  
Solvent: CDCl3  
Ambient temperature  
User: vmr1  
INOVA-400 "u400"  
Relax. delay 0.499 sec  
Pulse 45.0 degrees  
Acq. time 1.501 sec  
Waltz 15841.4 Hz  
1024 F2 partitions  
OBSERVE C13, 100.5688120 MHz  
DECOUPLE H1, 399.3571931 MHz  
Power 42 dB  
continuously on  
WALTZ-16 modulated  
DATA PROCESSING  
Line broadening 1.0 Hz  
FT size 131072  
Total time 34 min, 17 sec

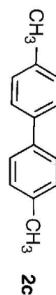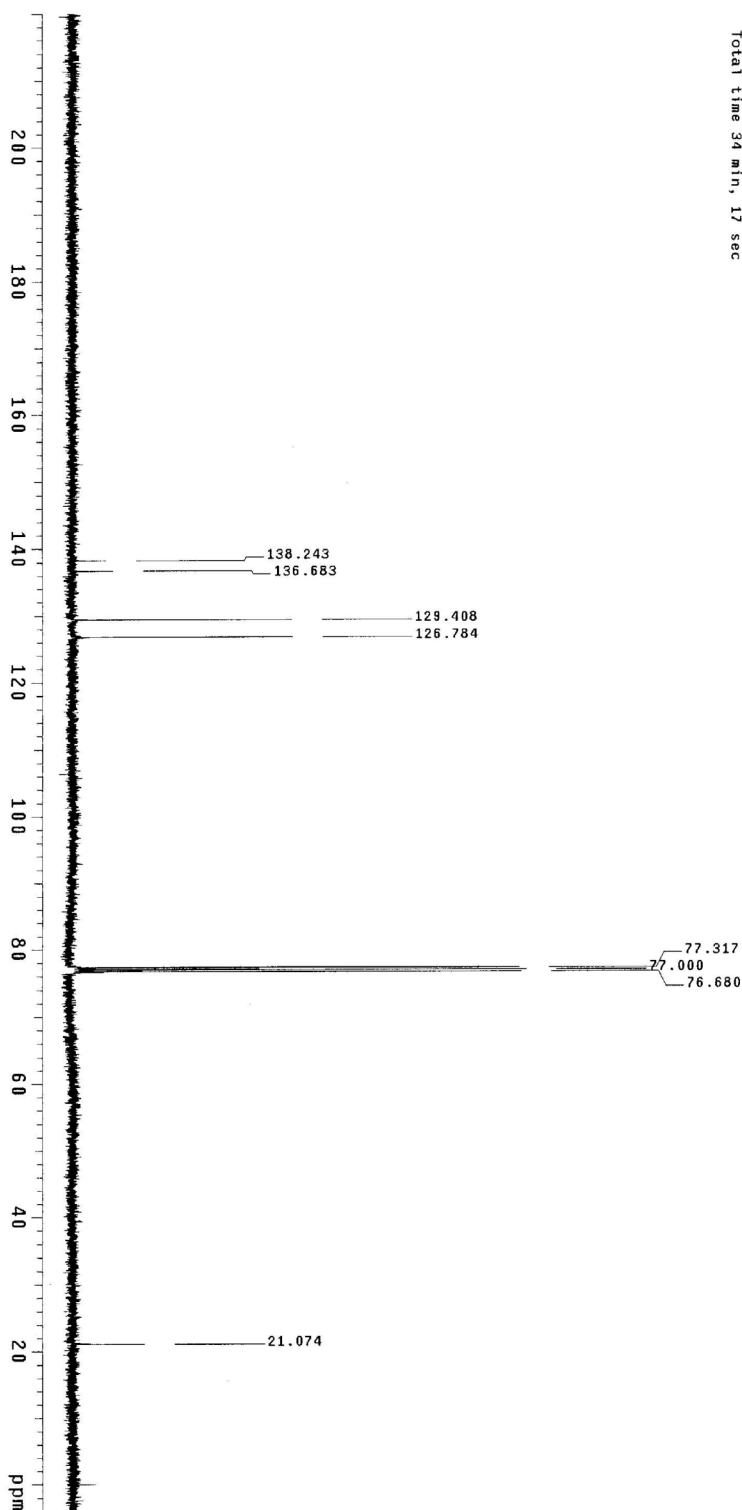

3,5-Dimethylbiphenyl  
Pulse Sequence: szpul  
Solvent: CDCl3  
Ambient temperature  
User: Vnmr1  
INSTR: 400 "u400"  
Relax. delay 1.496 sec  
Pulse 15.0 degrees  
Acq. time 3.554 sec  
Width 599.7 Hz  
8 repetitions  
OBSERVE H1, 399.9551801 MHz  
DATA PROCESSING  
FT size 65536  
Total time 0 min, 40 sec

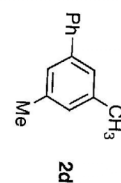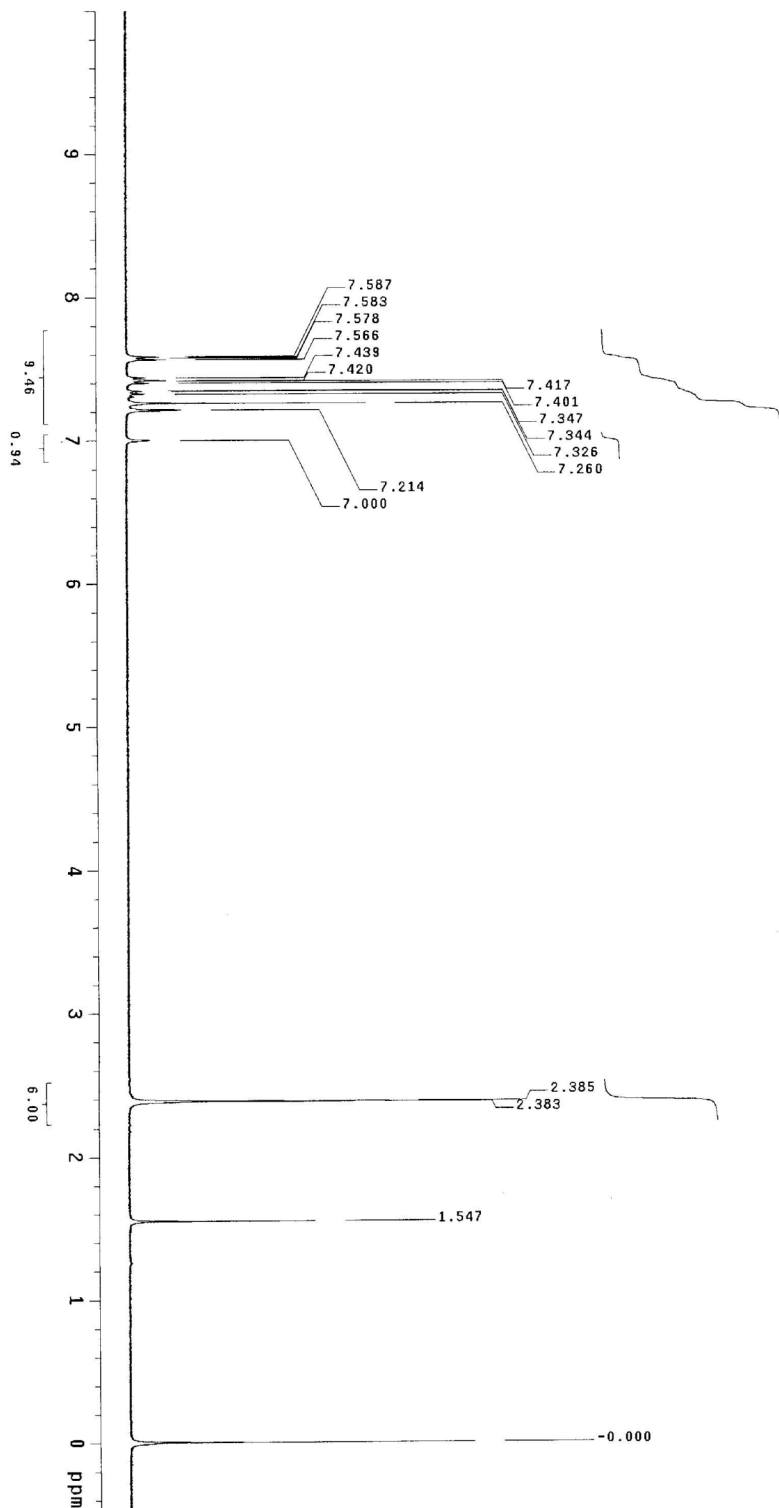

3-5  
~~4-4~~-Dimethylbiphenyl

Pulse Sequence: szpul  
Solvent: CDCl<sub>3</sub>  
Ambient temperature  
USP1  
INOVA-400 "u400"

Relax. delay 0.499 sec  
Pulse 45.000 sec  
Acq. time 1.501 sec  
Width 25141.4 Hz  
1024 repetitions  
OBSERVE C13, 100.568158 MHz  
DECOUPLE H1, 399.9571931 MHz  
Power 42 db  
continuously on  
WALTZ-16 modulated  
DATA PROCESSING  
F1 size 131072  
Total time 34 min, 17 sec

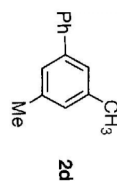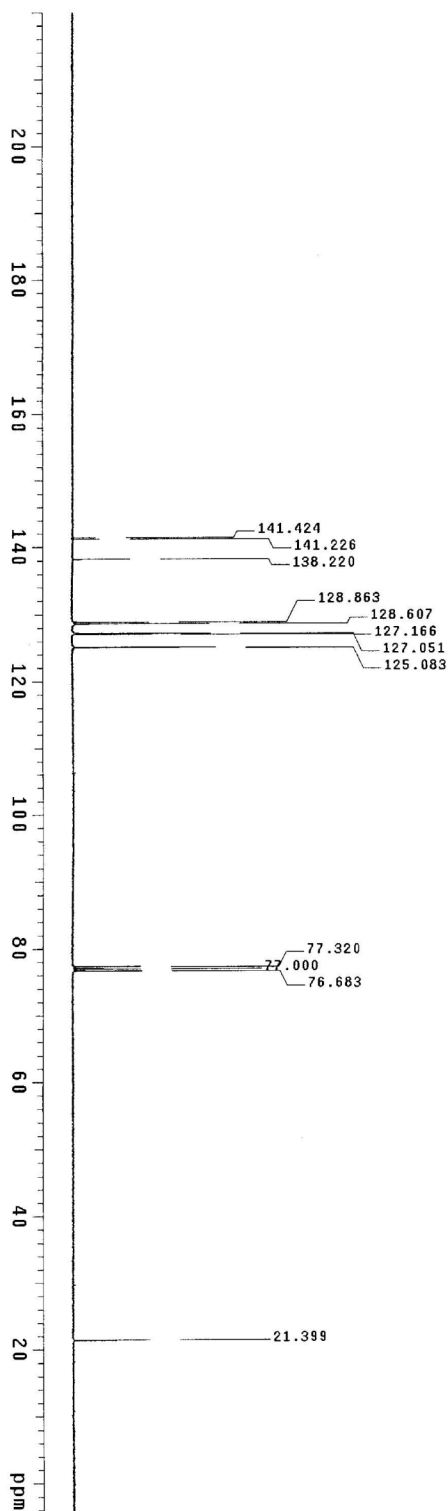

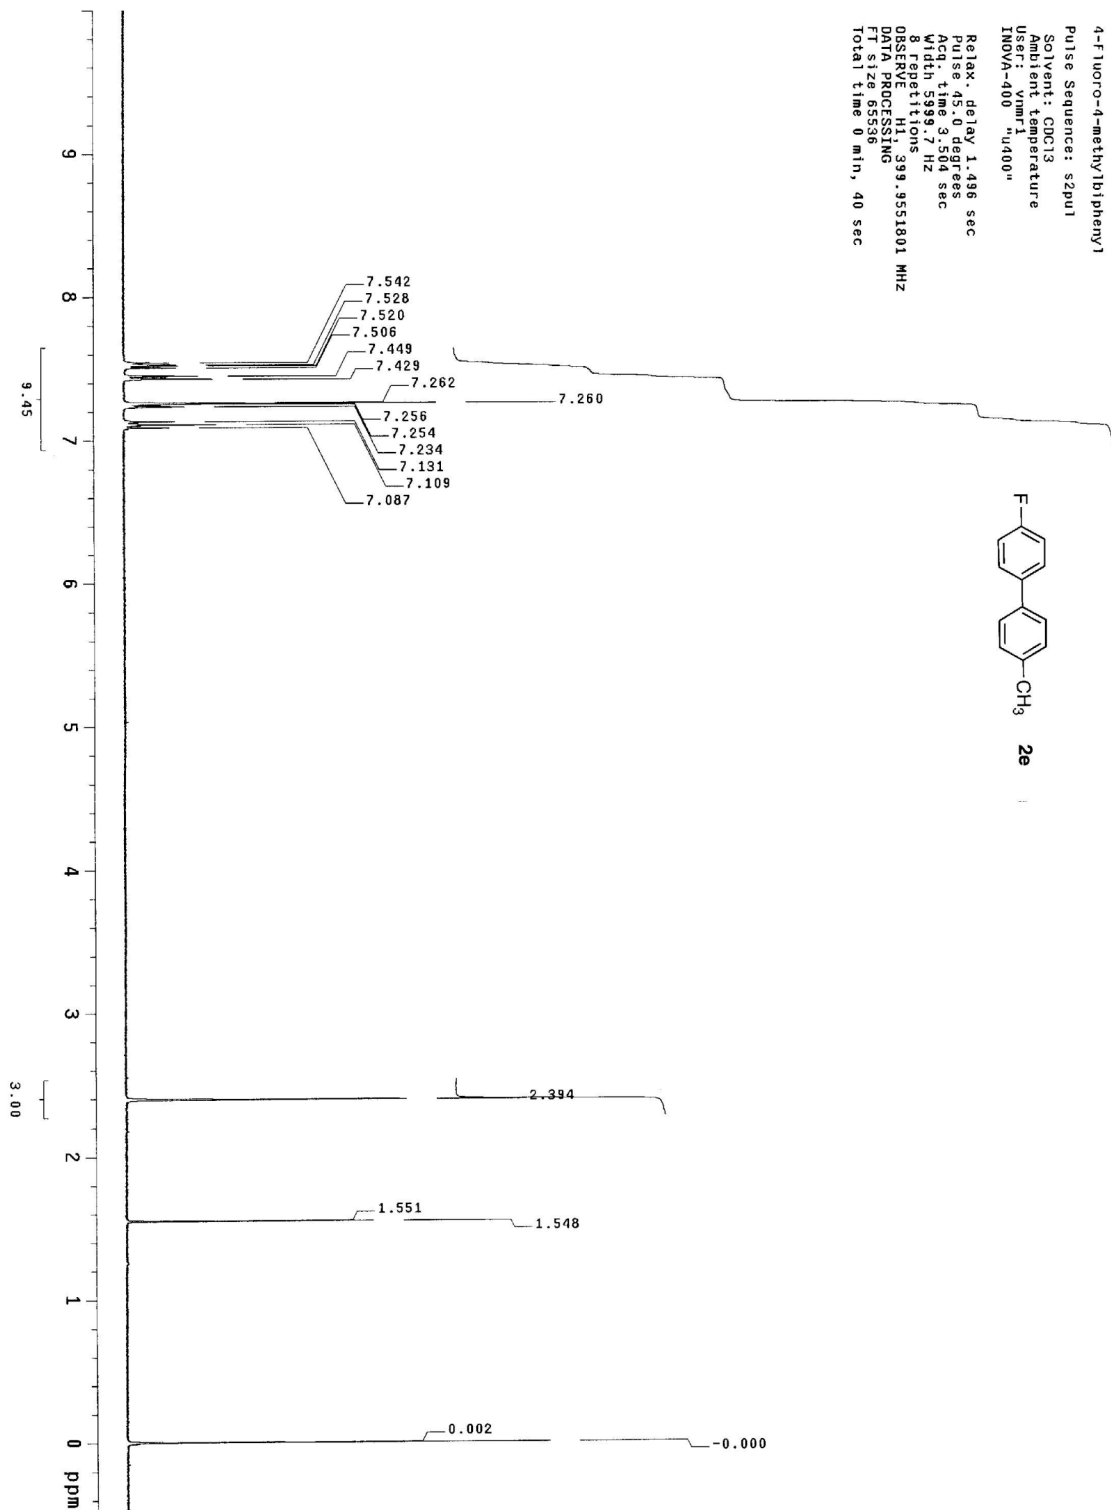

4-fluoro-4-methylbiphenyl

Pulse Sequence: szpul  
Solvent: CDCl3  
Ambient temperature  
User: ymr1  
INOVA-400 "u400"

Relax. delay 0.499 sec  
Pulse 45.0 degrees  
Acq. time 1.501 sec  
NUC1 25341.4 Hz  
NUC2 25341.4 Hz  
OBSERVE C13 100.568155 MHz  
DECOUPLE H1 399.3571931 MHz  
Power 42 dB  
continuously on  
WALTZ-16 modulated  
DATA PROCESSING  
Line broadening 1.0 Hz  
FT size 131072  
Total time 34 min, 17 sec

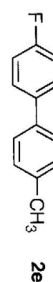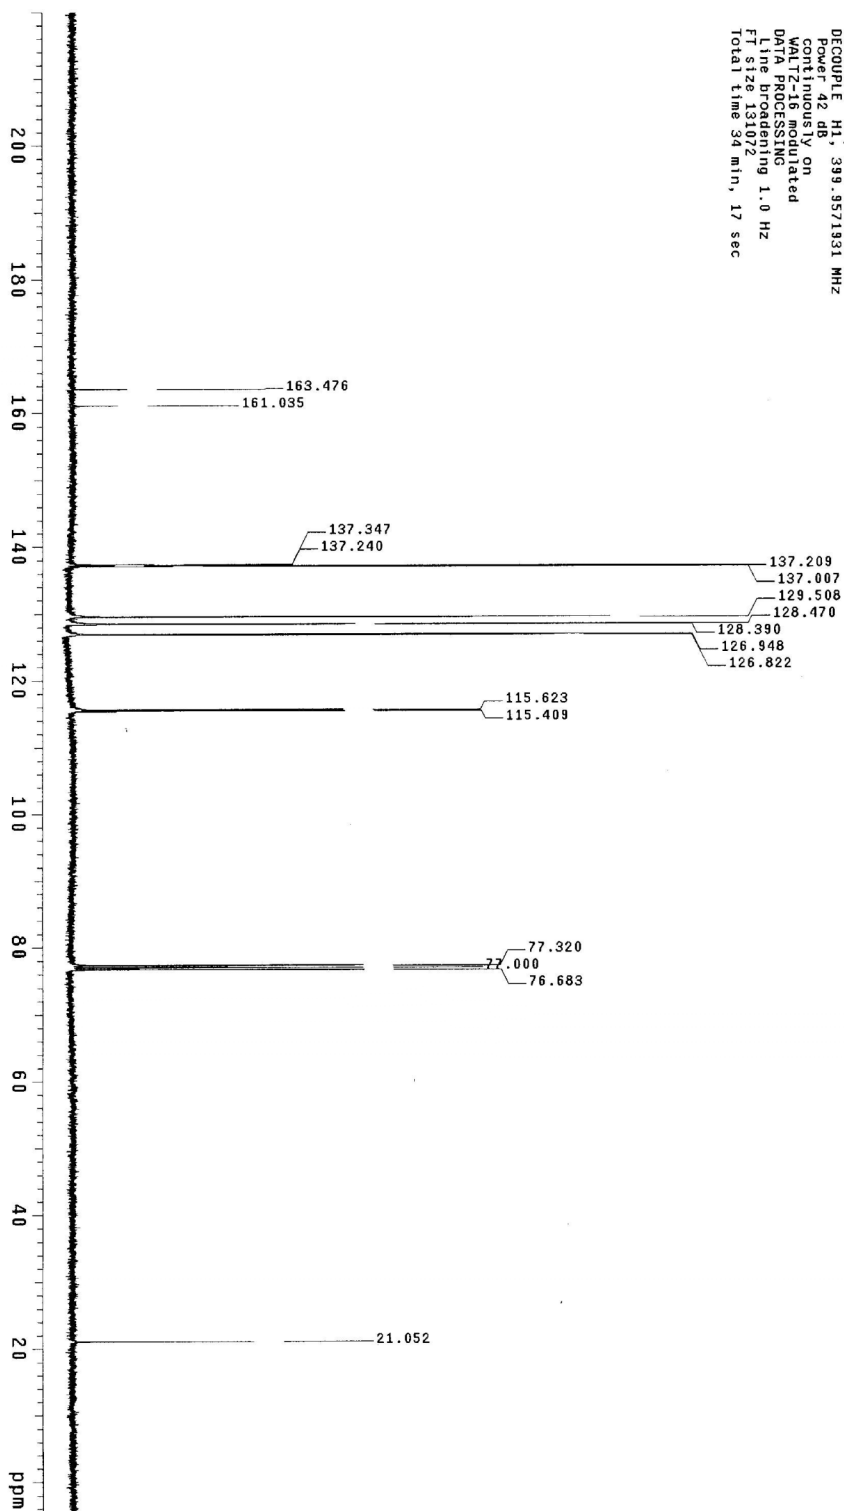





6.0

2-fluoro-4-phenyltoluene

Pulse Sequence: zgpg30

Solvent: CDCl3

Acq. Temp: 300.2 K

Acq. Time: 3.584 sec

Width: 5999.7 Hz

8 Repetitions

Observe: H1, 399.951803 MHz

DATA PROCESSING

FT size: 65536

Total time: 0 min, 40 sec

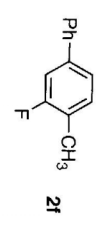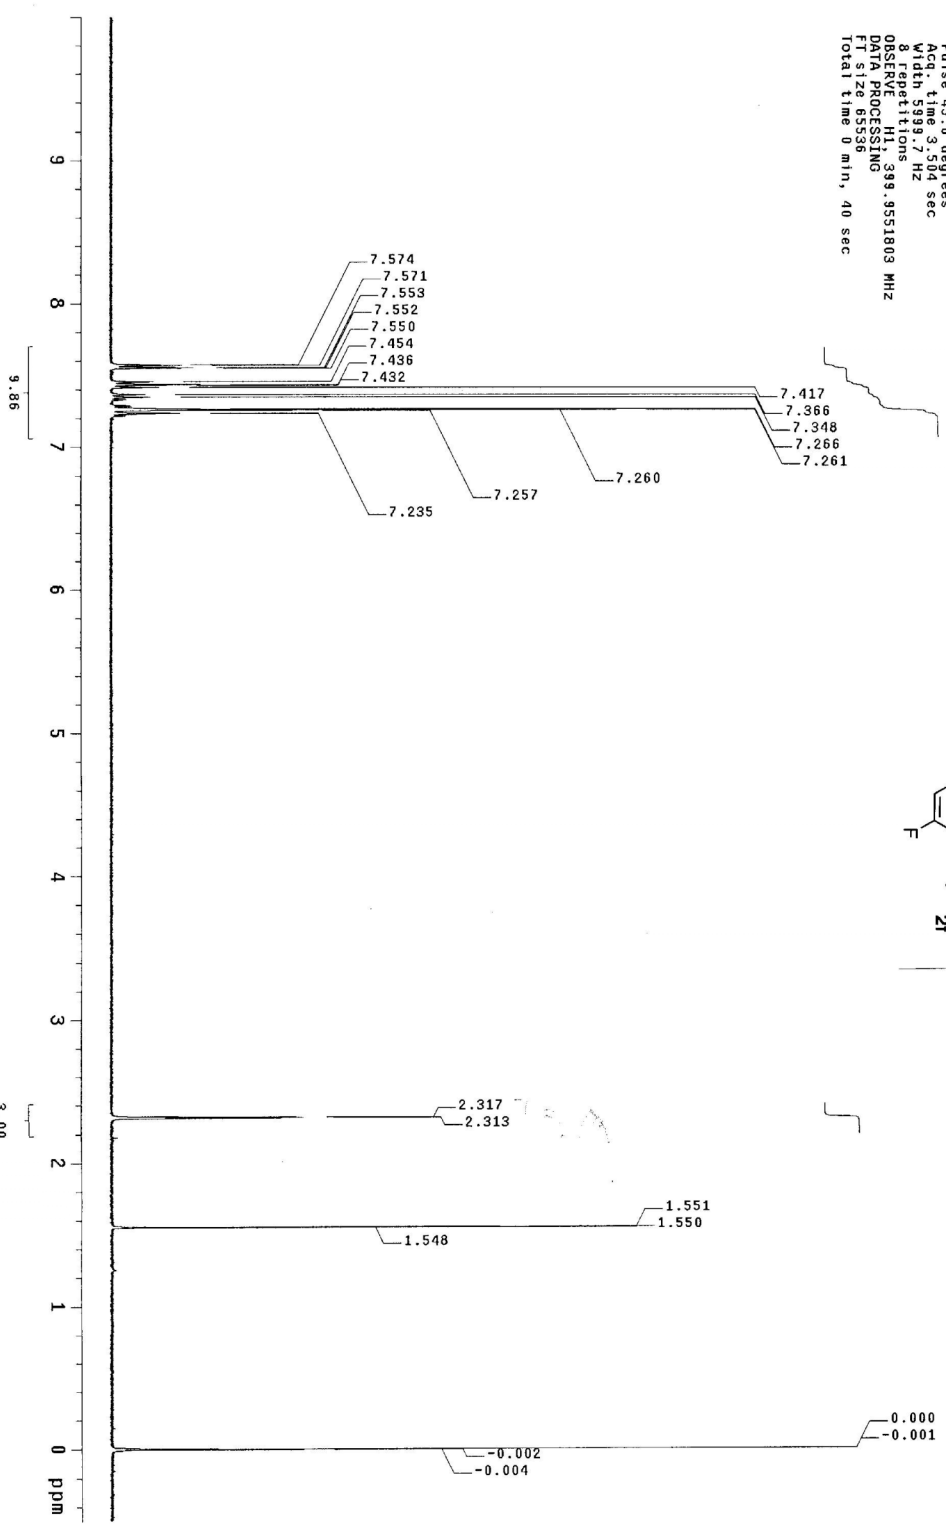

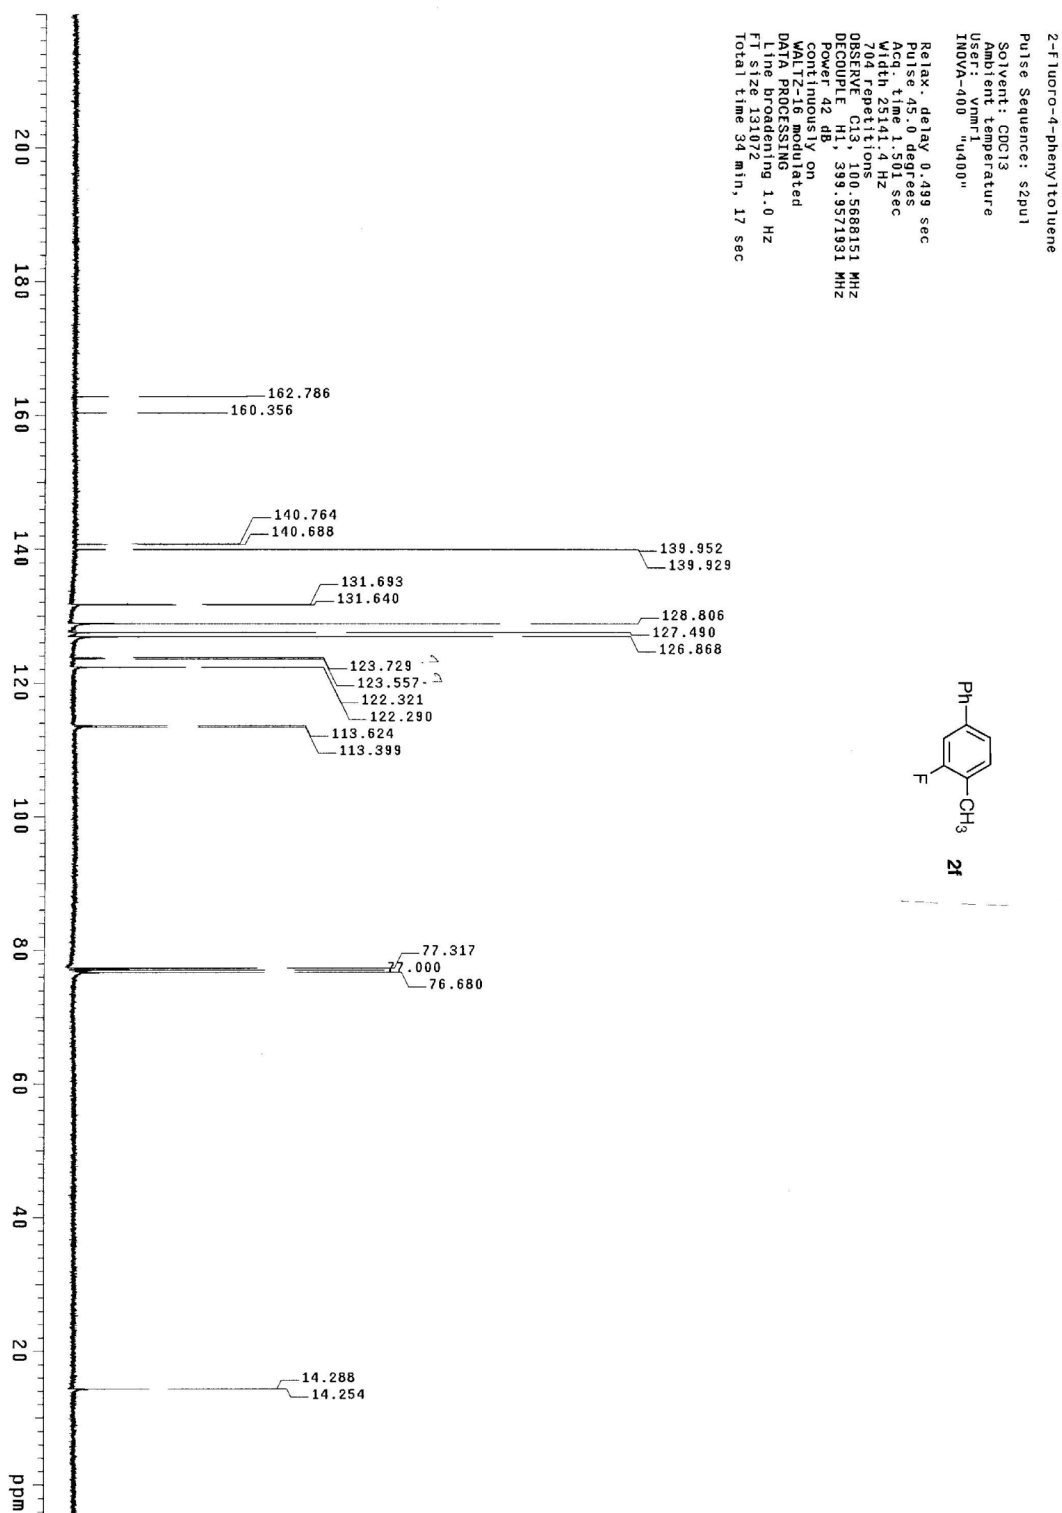

2-Fluoro-4-phenyltoluene  
 Pulse Sequence: zgpg30  
 Solvent: CDCl3  
 Ambient Temperature  
 NS: 1  
 INOVA-400 "400"  
 Relax. delay 9.500 sec  
 Pulse 12.0 degrees  
 Pulse 12.0 degrees  
 Width 100.0 kHz  
 16 repetitions  
 OBSERVE F19, 376.3343311 MHz  
 DATA PROCESSING  
 FT size 131072  
 Total time 2 min, 40 sec

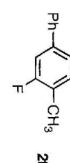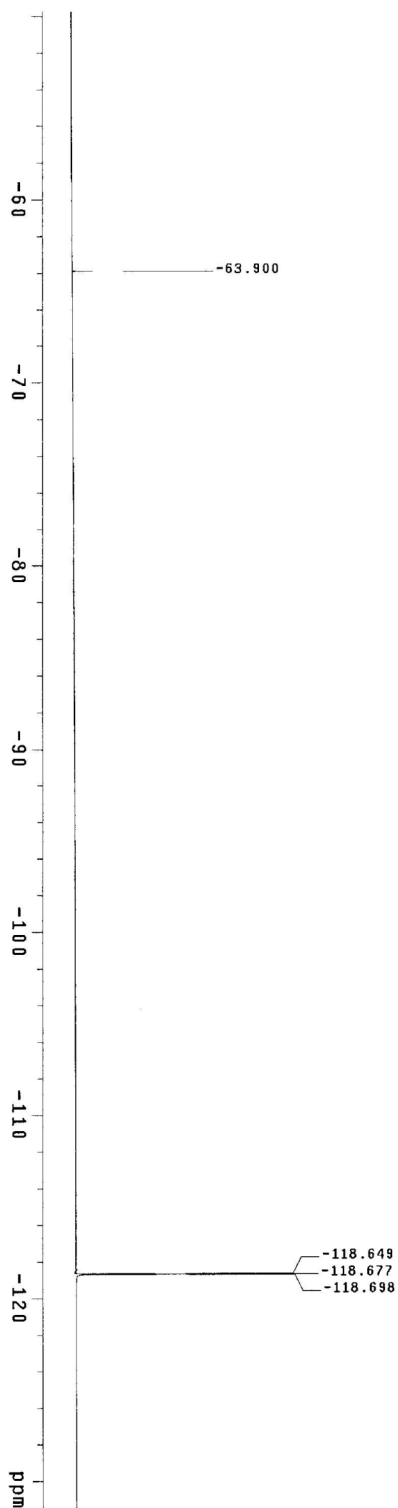

4-Benzyltoluene  
Pulse Sequence: szpu1  
Solvent: CDCl3  
Ambient temperature  
User: vmr1  
INOVA-400 "u400"  
Relax. delay 1.496 sec  
Pulse 45.0 degrees  
Acq. time 3.504 sec  
Width 19.772  
8 repetitions  
OBSERVE H1, 399.9551807 MHz  
DATA PROCESSING  
FT size 65536  
Total time 0 min, 40 sec

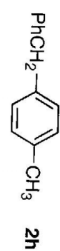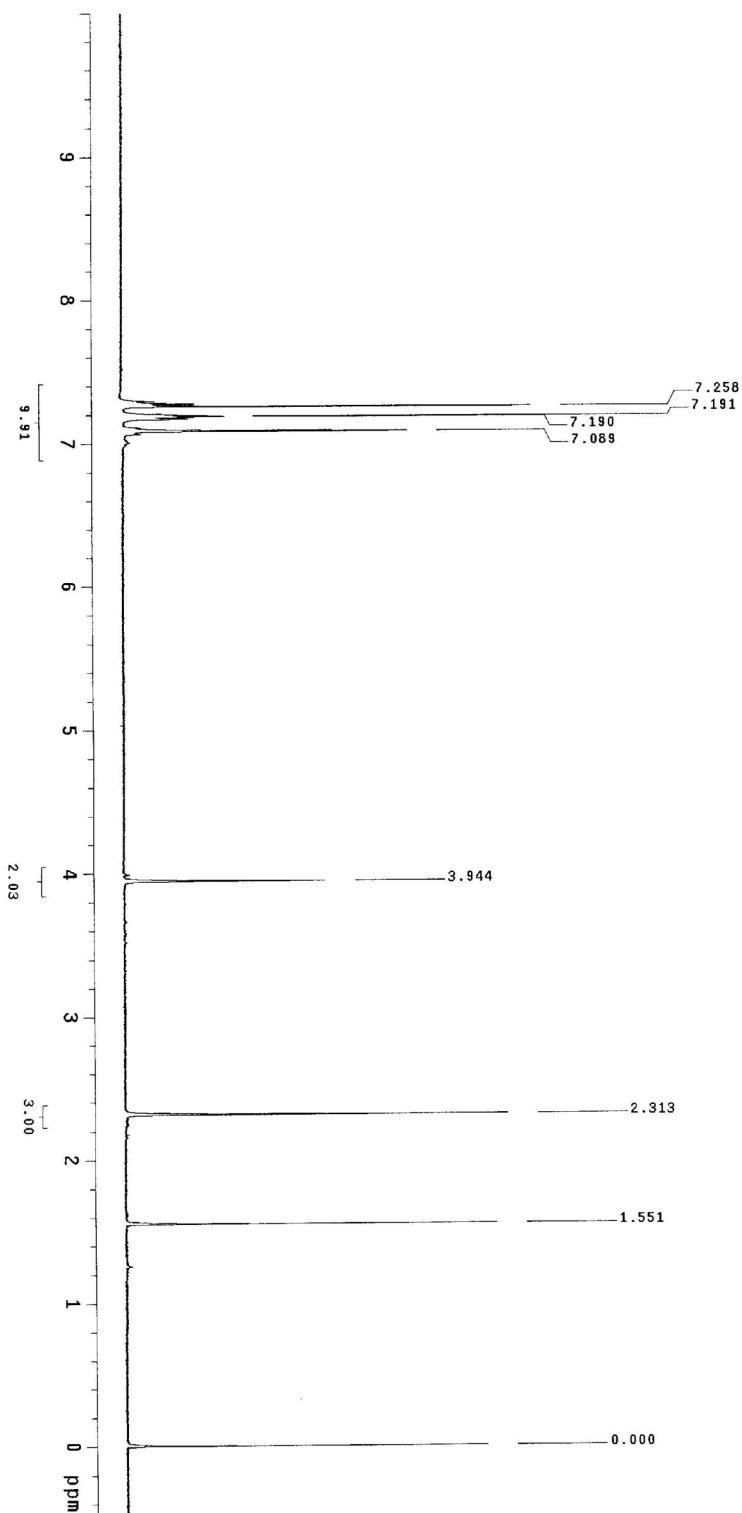

4-Benzyltoluene  
Pulse Sequence: szpul  
Solvent: CDCl3  
Ambient temperature  
User: vmmr1  
INOVA-400 "u400"  
Relax. delay 0.499 sec  
Pulse 45.0 degrees  
Acq time 1.51 sec  
Width 2514.4 Hz  
512 repetitions  
OBSERVE C13, 100.568162 MHz  
DECOUPLE H1, 399.9571931 MHz  
Power 42 dB  
continuously on  
WALTZ-16 modulated  
DATA PROCESSING  
Line broadening 1.0 Hz  
F1 size 13102  
F2 size 13102  
Total time 34 min, 17 sec

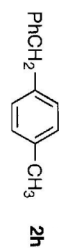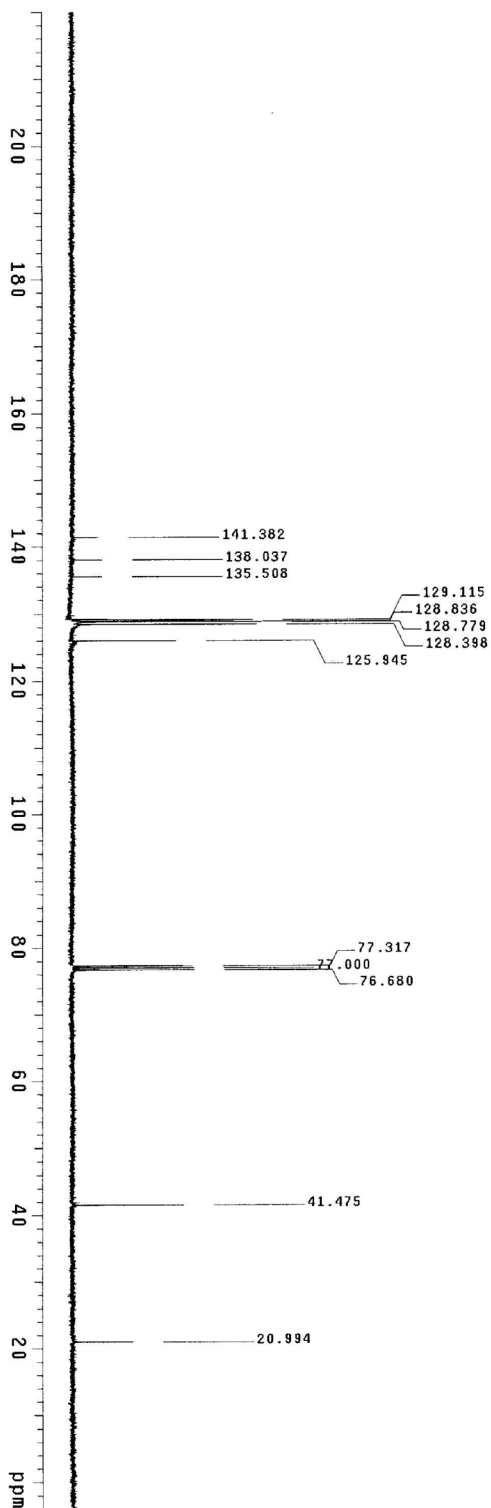

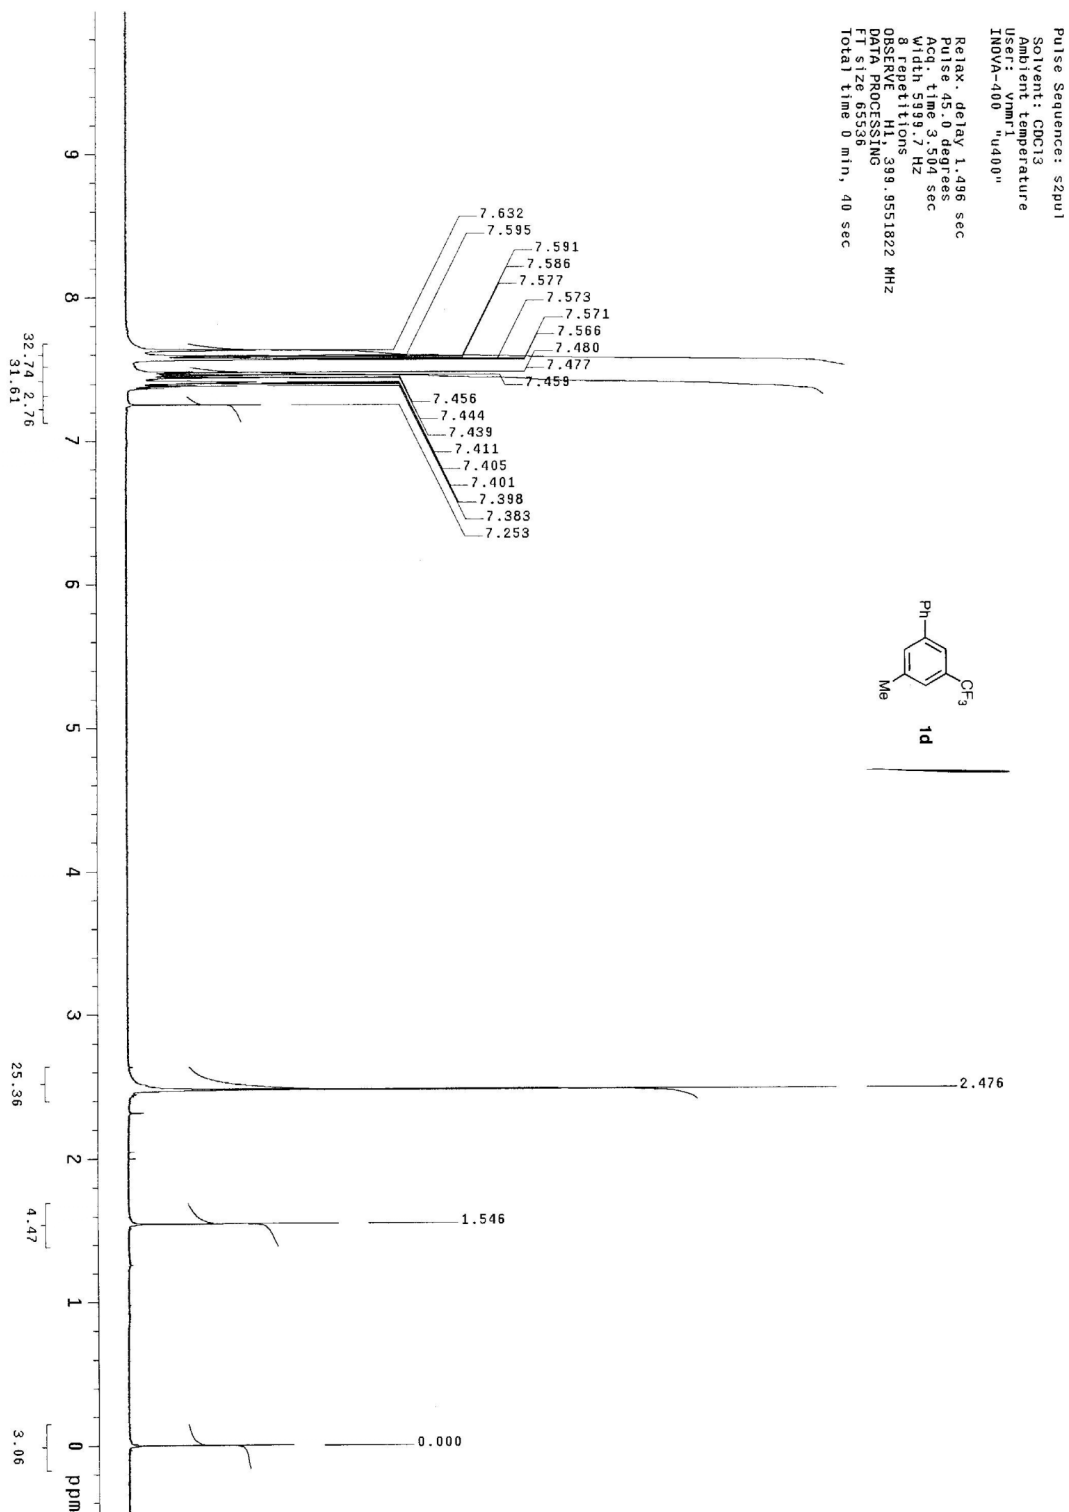

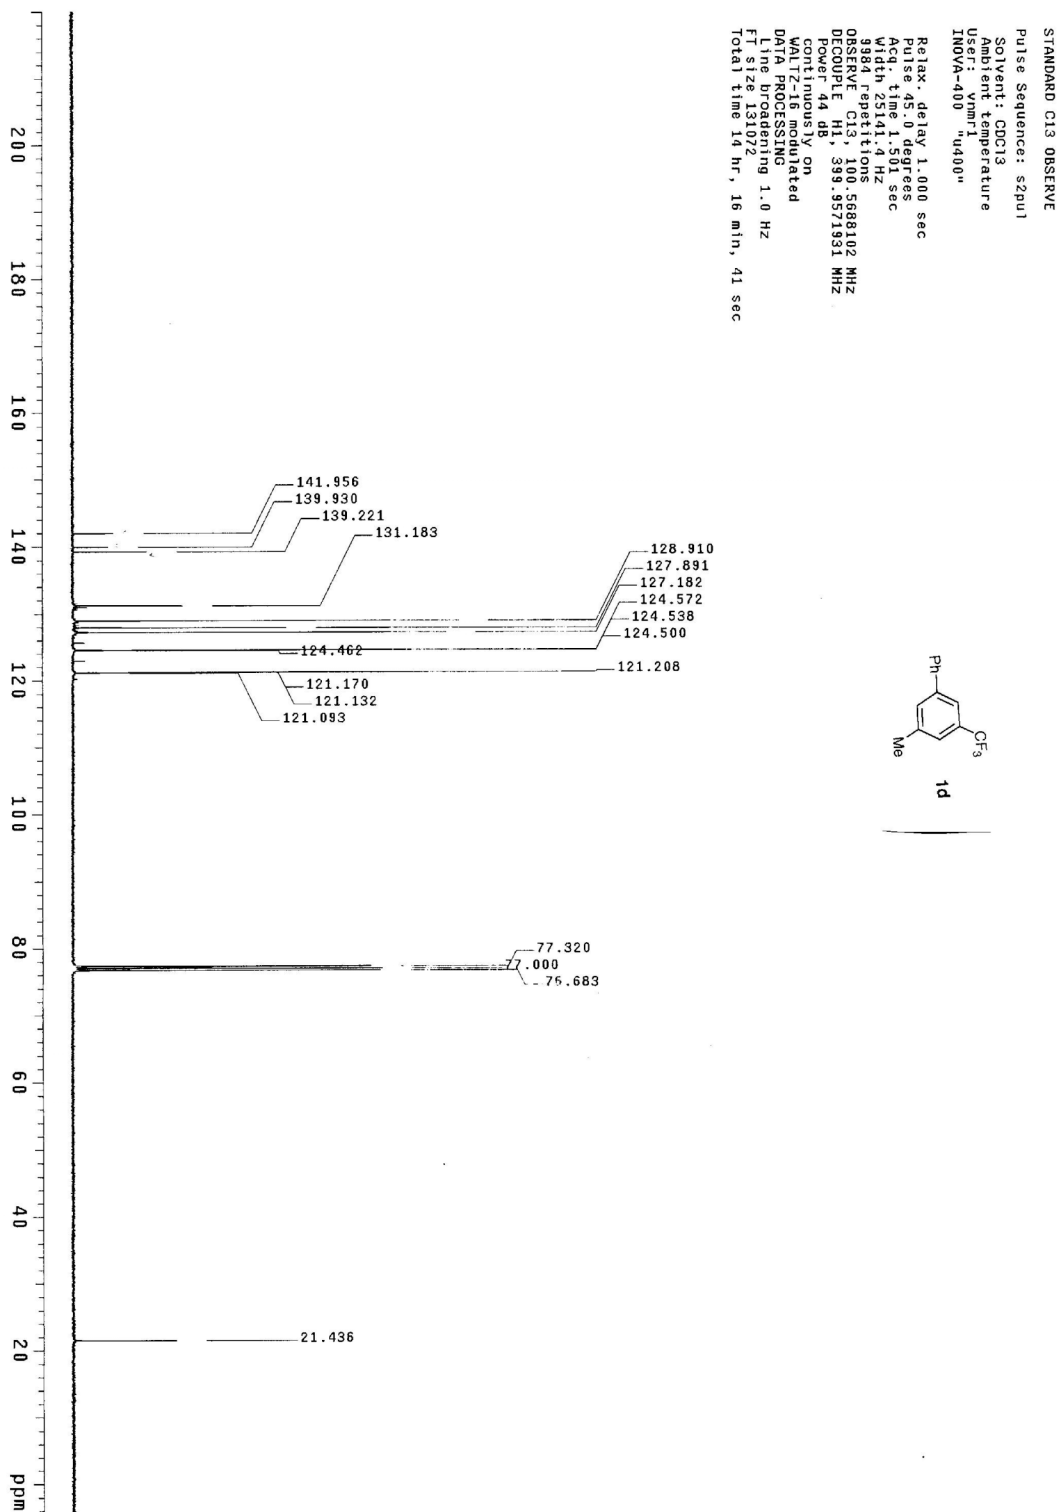



3-(trifluoromethyl)-5-methylbiphenyl

Pulse Sequence: s2pu1

Solvent: CDCl3

Ambient temperature

User: vnmr1

INOVA-400 "u400"

Relax. delay 9.500 sec

Pulse 45.0 degrees

Acq. time 0.500 sec

Width 100.0 kHz

Number of scans

Observed F1 125.763343216 MHz

Observed F2

DATA PROCESSING

FT size 131072

Total time 9 min, 0 sec

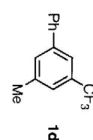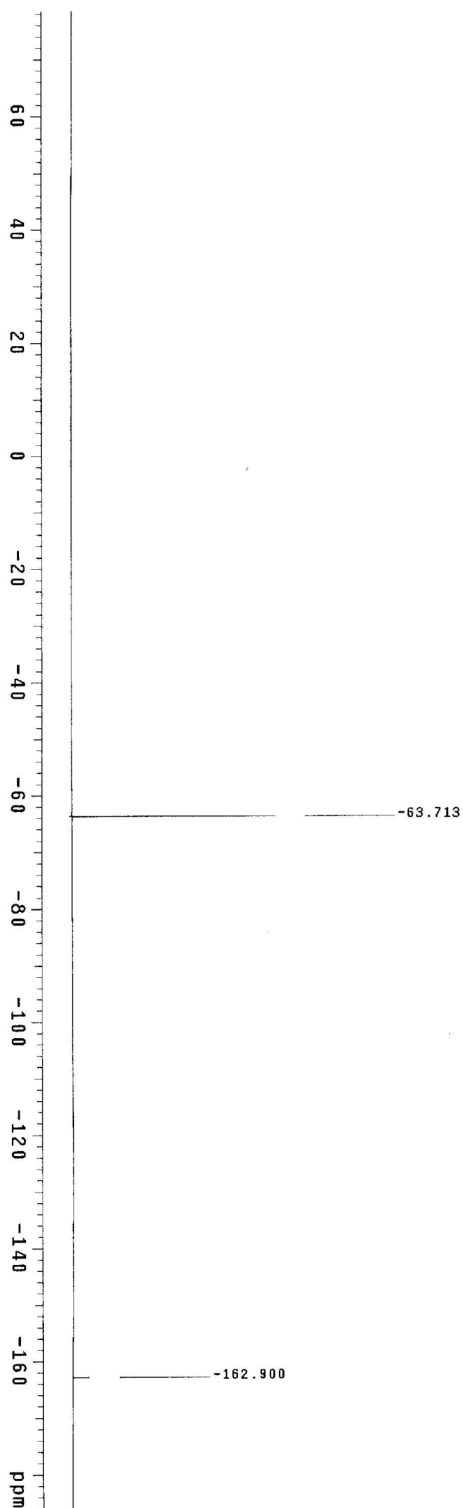

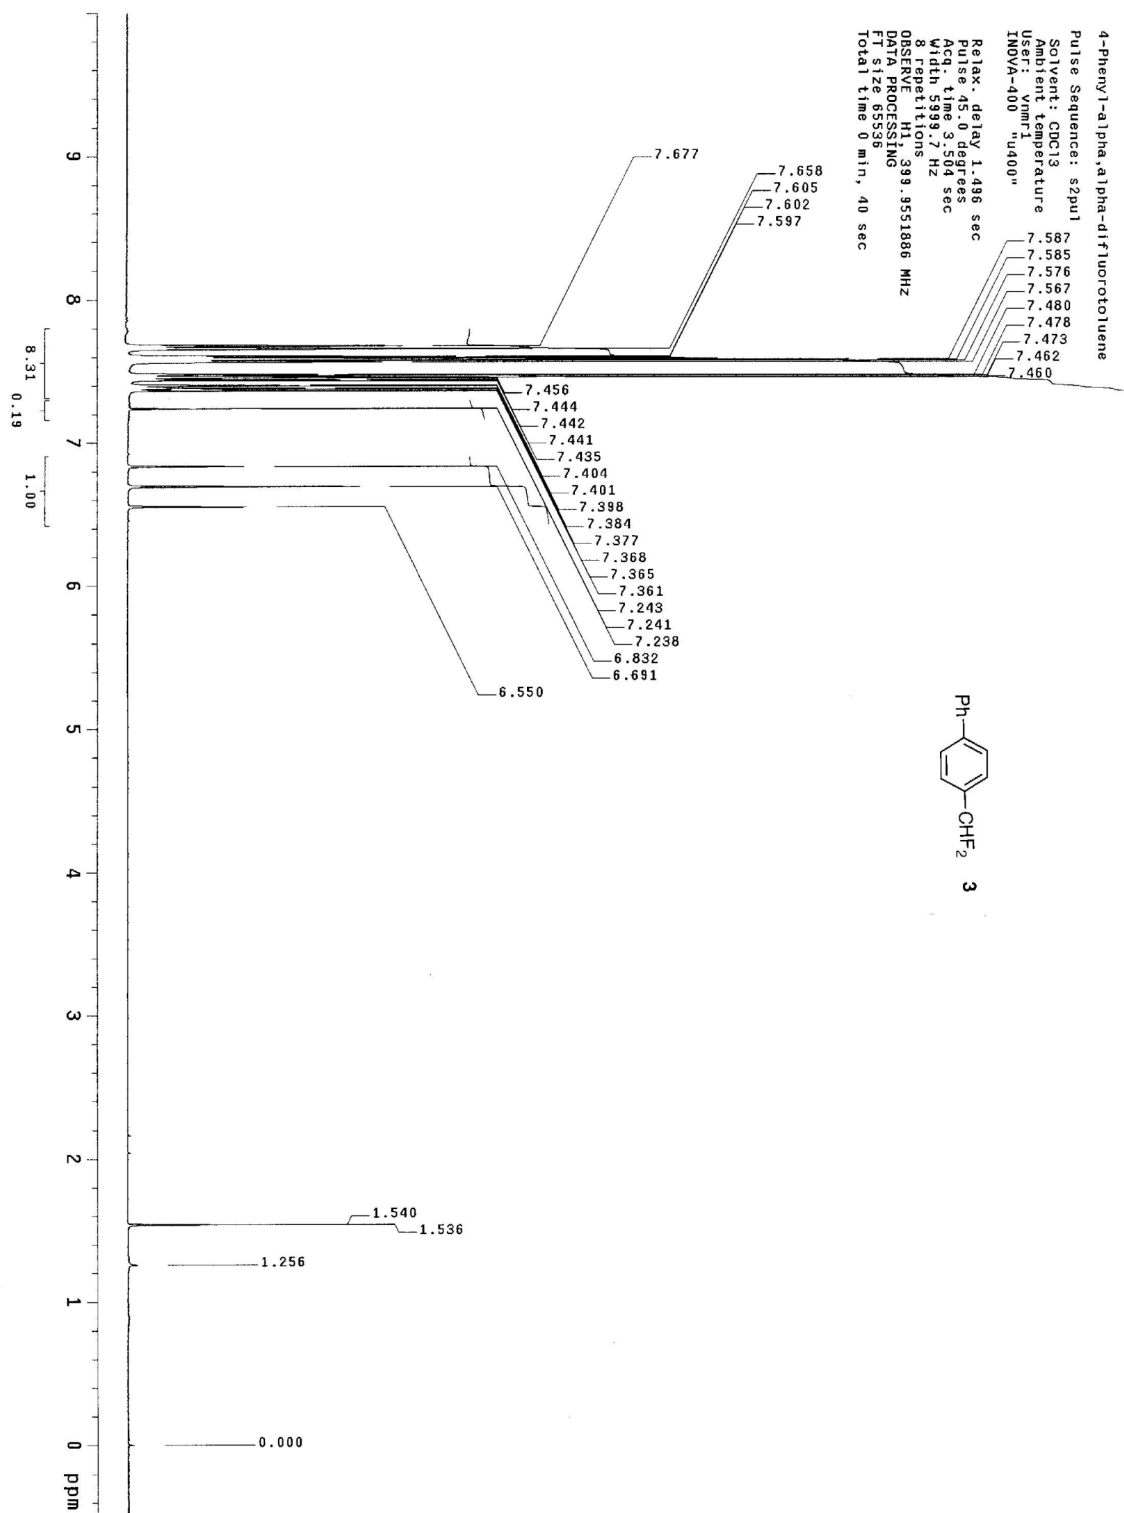

4-phenyl- $\alpha,\alpha$ -difluorotoluene  
Pulse Sequence: s2pul  
Solvent: CDCl<sub>3</sub>  
Ambient temperature  
User: ymmr1  
INOVA-400 "u400"  
Relax. delay 0.499 sec  
Pulse 45.0 degrees  
Acq. time 1.501 sec  
NUC1: 13C  
NUC2: 1H 253.414 MHz  
1300 MHz  
OBSERVE C13 100.568139 MHz  
DECOUPLE H1 399.3571931 MHz  
Power 42 dB  
continuously on  
WALTZ-16 modulated  
DATA PROCESSING  
Line broadening 1.0 Hz  
FT size 131072  
Total time 43 min, 32 sec

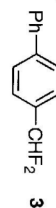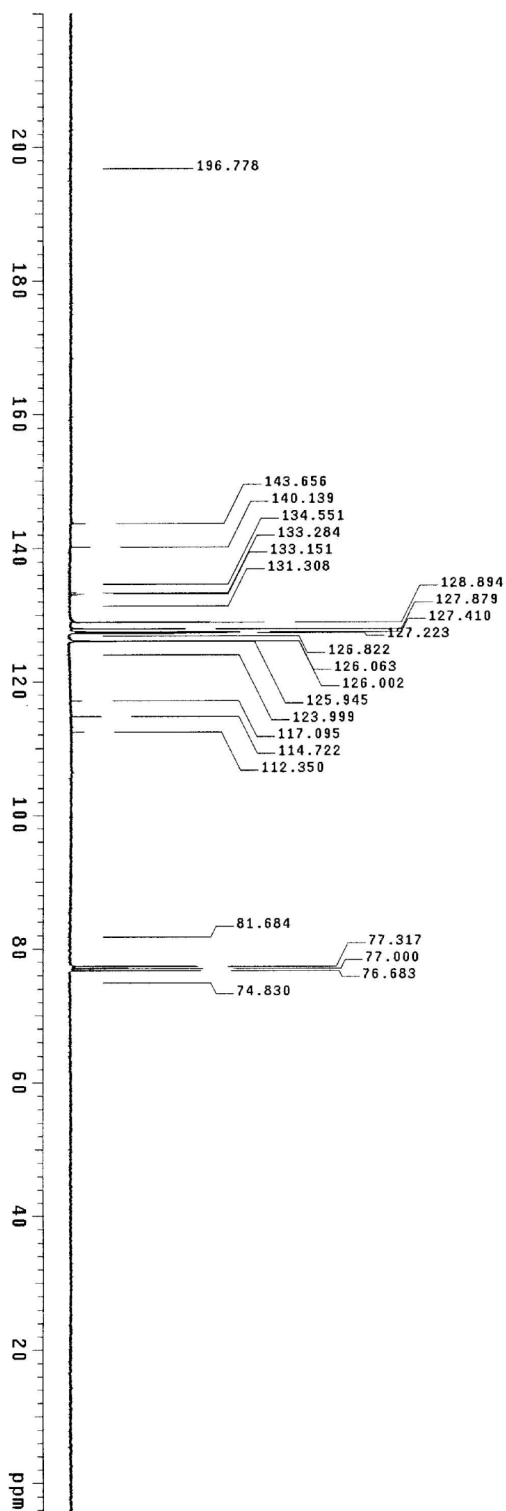

4-Phenyl- $\alpha$ , $\alpha$ -difluorotoluene  
Pulse Sequence: szpul  
Solvent: CDCl<sub>3</sub>  
Ambient temperature  
User: ymm1  
INOVA-400 "u400"  
Relax. delay 9.500 sec  
Pulse 45.0 degrees  
Acq. time 0.500 sec  
NUC1: 13C 100 MHz  
NUC2: 1H 400 MHz  
16 Channels  
OBSRVF F19: 376.3343250 MHz  
DATA PROCESSING  
FT size 131072  
Total time 2 min, 40 sec

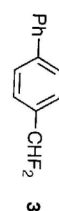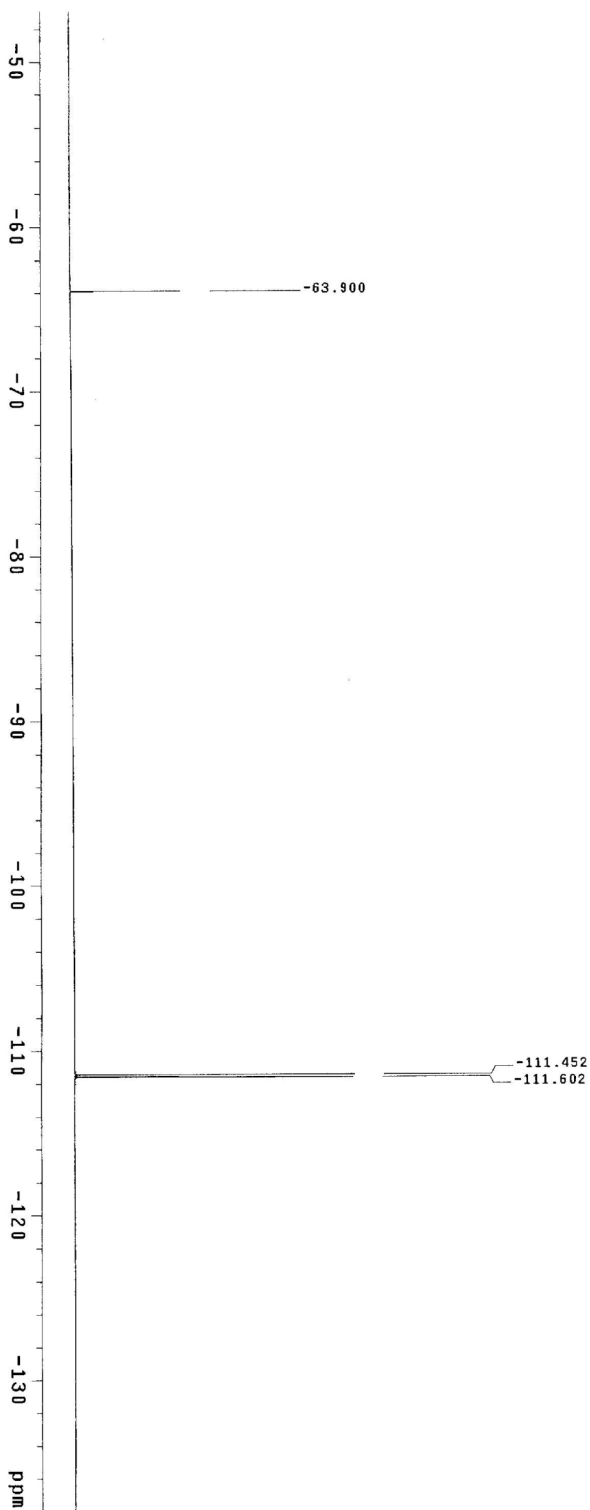

3-Phenyl-a,a-difluorotoluene  
Pulse Sequence: szpu1  
Solvent: CDCl3  
Ambient temperature  
User: ynmr1  
INOVA-400 "u400"  
Relax. delay 1.496 sec  
Pulse 45.0 degrees  
Acq. time 3.504 sec  
Width 5999.7 Hz  
8 repetitions  
OBSERVE H1: 399.9551897 MHz  
DATA PROCESSING  
F1: 125.530 MHz  
Total time 0 min, 40 sec

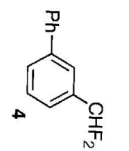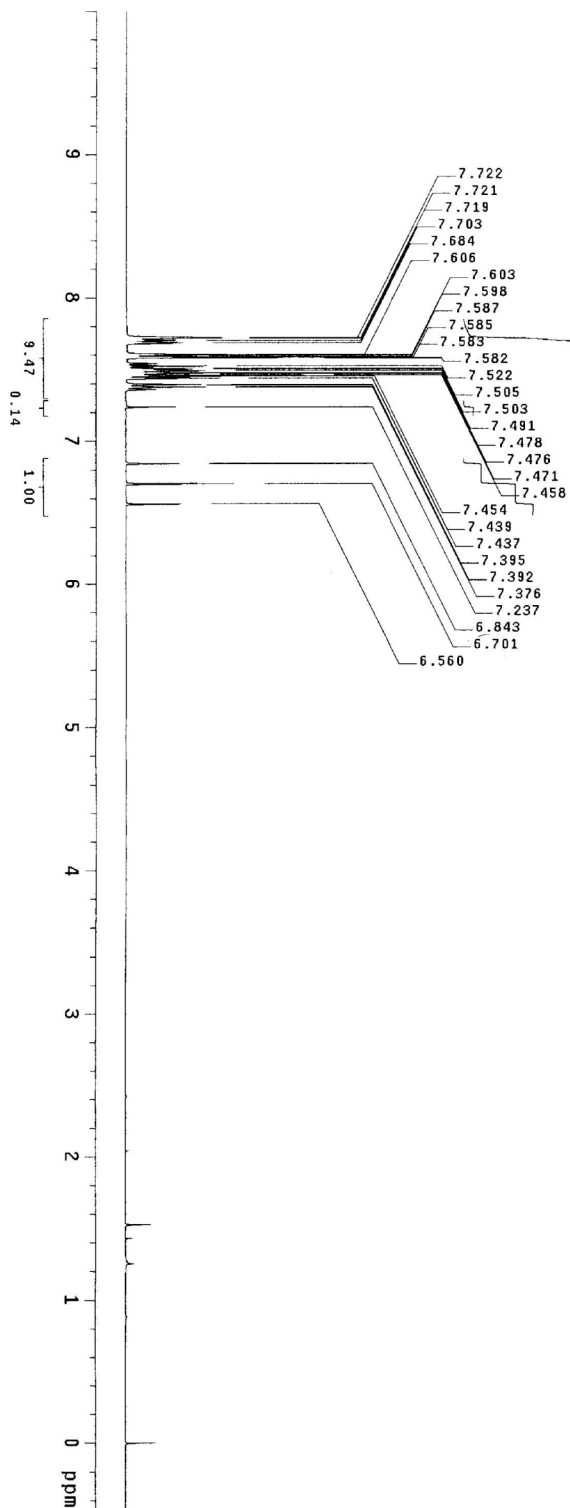

3-Phenyl- $\alpha$ , $\alpha$ -difluorotoluene  
Pulse Sequence: s2pul  
Solvent: CDCl<sub>3</sub>  
Ambient temperature  
User: rnm1  
INOVA-400 "u400"  
Relax. delay 0.499 sec  
Pulse 45.0 degrees  
Acq. time 1.00 sec  
Width 25141.4 Hz  
1400 repetitions  
OBSERVE C13, 100.628135 MHz  
DECOUPLE H1, 399.9571531 MHz  
Power 42 dB  
continuously on  
WALTZ-16 modulated  
DATA PROCESSING  
Line broadening 1.0 Hz  
F1 127.131972  
Total time 46 min, 53 sec

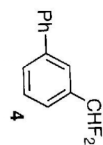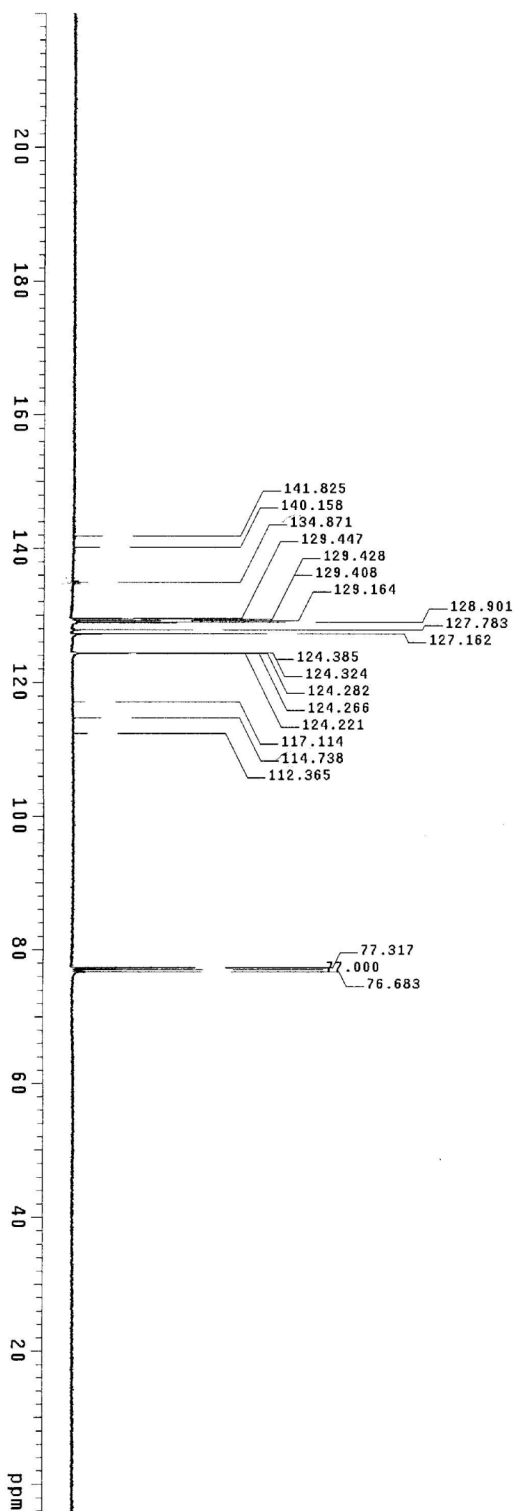

3-Phenyl- $\alpha$ , $\alpha$ -difluorotoluene

Pulse Sequence: s2pul

Solvent: CDCl<sub>3</sub>

Ambient temperature

User: ymar1

INOVA-400 "u400"

Relax. delay 9.500 sec

Pulse 45.0 degrees

Acq. time 0.500 sec

Width 100.0 kHz

16 repetitions

OBSERVE F18, 376.3343250 MHz

DATA PROCESSING

FT size 151072

Total time 2 min, 40 sec

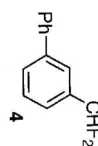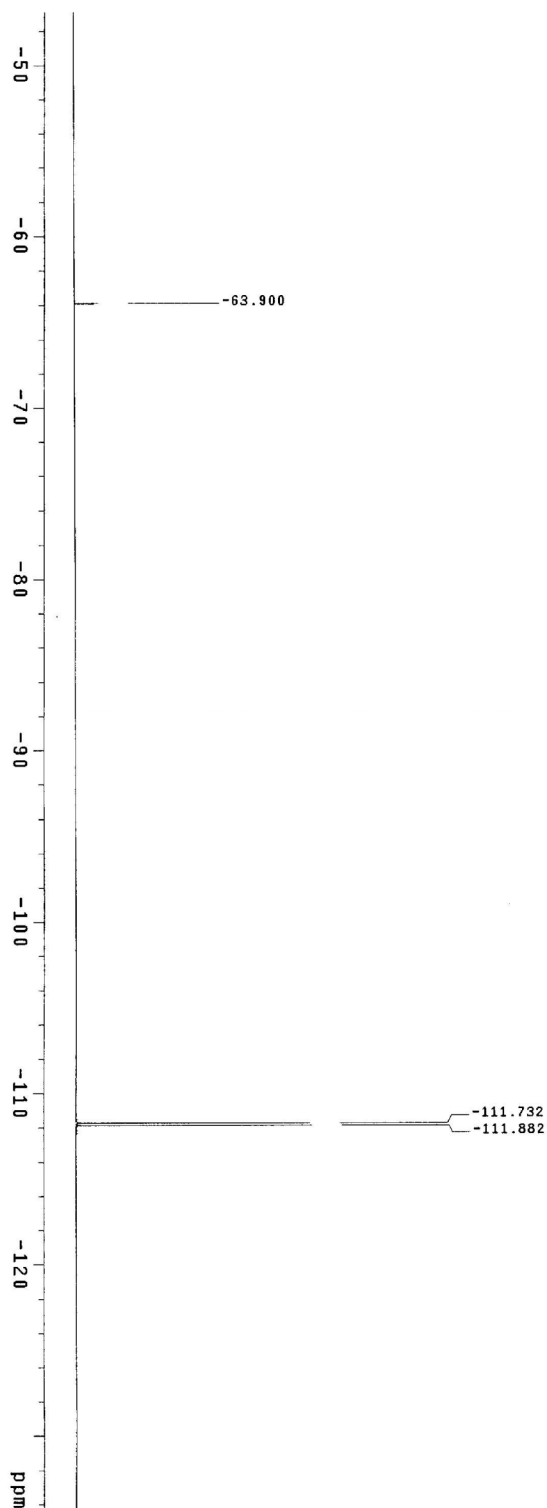

Supplement: Supplementary file 1 [file 4714711]
